# Supplementary material for: Forecasting temperature and rainfall using deep learning for the challenging climates of Northern India
Source: PeerJ Comput Sci. 2025 Aug 22;11:e3012. doi: 10.7717/peerj-cs.3012 (PMC12453782; doi:10.7717/peerj-cs.3012)
Supplement: Supplemental Information 2 [file peerj-cs-11-3012-s002.docx]

Supplementary Algorithm S2 **Working of Back Propagation through time (BPPT)**

| **Algorithm 2: Working of Back Propagation through time (BPPT)** |
| --- |
| **Input:** A sequence of data points *x*, denoted as where represents the input at a specific time step "*t*" within the sequence.   1. The hidden state at time step "*t*", denoted as , is calculated by combining the current input with the previous hidden state . This computation is expressed as   where , α and θ have the usual meanings.   1. The loss function, such as Mean Squared Error (MSE) or cross-entropy loss, is applied to calculate the loss at each time step. We can represent the loss at a specific time step *‘t’* as .   The gradients of the loss with respect to the parameters of the network is calculated from the final time step. Subsequently, these gradients are propagated in a backward direction across previous time steps. The gradient at time step *‘t’*, which signifies the impact of the loss on the hidden state at *‘t’* can be represented as:   1. The gradients are accumulated at each step as they propagate through time ensuring that dependencies between different time steps are captured effectively. Accumulated gradients are represented as 2. The parameters of the network are updated by utilizing optimization algorithms such as Adam, SGD and RMSprop. The parameter update for each weight can be computed as:   where is the update in weight and is the learning rate. |
