# Supplementary material for: Forecasting temperature and rainfall using deep learning for the challenging climates of Northern India
Source: PeerJ Comput Sci. 2025 Aug 22;11:e3012. doi: 10.7717/peerj-cs.3012 (PMC12453782; doi:10.7717/peerj-cs.3012)
Supplement: Supplemental Information 4 [file peerj-cs-11-3012-s004.xlsx]

## Sheet: in
Station name	Latitude	Longitude	Date	Rainfall	Tmin	Tmax
Jammu	32.69	74.84	2000-01-01	0	1.58	16.69
Jammu	32.69	74.84	2000-01-02	0	1.34	17.18
Jammu	32.69	74.84	2000-01-03	0	1.28	16.93
Jammu	32.69	74.84	2000-01-04	0	1.19	16.37
Jammu	32.69	74.84	2000-01-05	0	1.55	15.56
Jammu	32.69	74.84	2000-01-06	0	1.93	13.95
Jammu	32.69	74.84	2000-01-07	0	2.56	13.41
Jammu	32.69	74.84	2000-01-08	0	4.01	13.87
Jammu	32.69	74.84	2000-01-09	0	4.95	15.25
Jammu	32.69	74.84	2000-01-10	0.7202	4.79	15.83
Jammu	32.69	74.84	2000-01-11	0.5156	6.03	15.08
Jammu	32.69	74.84	2000-01-12	30.8878	6.35	12.47
Jammu	32.69	74.84	2000-01-13	81.1603	5.1	10.61
Jammu	32.69	74.84	2000-01-14	37.0741	2.98	11.16
Jammu	32.69	74.84	2000-01-15	0.6689	-0.23	9.85
Jammu	32.69	74.84	2000-01-16	0	-1.77	10.82
Jammu	32.69	74.84	2000-01-17	0	0.96	10.4
Jammu	32.69	74.84	2000-01-18	0	0.88	11.95
Jammu	32.69	74.84	2000-01-19	0	3.34	13.07
Jammu	32.69	74.84	2000-01-20	0	2.44	15.53
Jammu	32.69	74.84	2000-01-21	0	2.81	15.13
Jammu	32.69	74.84	2000-01-22	0	3.98	15.94
Jammu	32.69	74.84	2000-01-23	0	2.8	15.25
Jammu	32.69	74.84	2000-01-24	0	3.08	16.03
Jammu	32.69	74.84	2000-01-25	0	4.46	15.47
Jammu	32.69	74.84	2000-01-26	1.1644	4.12	10.08
Jammu	32.69	74.84	2000-01-27	0.1043	3.25	12.21
Jammu	32.69	74.84	2000-01-28	0	3.3	14.87
Jammu	32.69	74.84	2000-01-29	0	2.31	15.72
Jammu	32.69	74.84	2000-01-30	0	3.17	16.44
Jammu	32.69	74.84	2000-01-31	0	5.36	18.68
Jammu	32.69	74.84	2000-02-01	35.0613	6.13	15.99
Jammu	32.69	74.84	2000-02-02	3.198	2.46	12.64
Jammu	32.69	74.84	2000-02-03	0	2.87	12.7
Jammu	32.69	74.84	2000-02-04	0	3.77	15.69
Jammu	32.69	74.84	2000-02-05	0	4.02	12.73
Jammu	32.69	74.84	2000-02-06	1.0323	2.56	11.03
Jammu	32.69	74.84	2000-02-07	11.0147	1.98	13.85
Jammu	32.69	74.84	2000-02-08	0	2.75	16.02
Jammu	32.69	74.84	2000-02-09	0	3.01	14.84
Jammu	32.69	74.84	2000-02-10	2.3685	3.95	14.83
Jammu	32.69	74.84	2000-02-11	16.6976	3.85	11.27
Jammu	32.69	74.84	2000-02-12	0	2.84	10.67
Jammu	32.69	74.84	2000-02-13	0.8985	1.28	10.92
Jammu	32.69	74.84	2000-02-14	0	1.46	14.15
Jammu	32.69	74.84	2000-02-15	0	3.58	15.85
Jammu	32.69	74.84	2000-02-16	0	4.42	16.6
Jammu	32.69	74.84	2000-02-17	0	3.32	16.52
Jammu	32.69	74.84	2000-02-18	0	2.31	15.7
Jammu	32.69	74.84	2000-02-19	0	2.08	15.24
Jammu	32.69	74.84	2000-02-20	0	3.21	15.29
Jammu	32.69	74.84	2000-02-21	1.0418	1.87	10.98
Jammu	32.69	74.84	2000-02-22	0	2.23	15.1
Jammu	32.69	74.84	2000-02-23	0	2.31	16.56
Jammu	32.69	74.84	2000-02-24	0	3.33	16.79
Jammu	32.69	74.84	2000-02-25	0	2.56	16.98
Jammu	32.69	74.84	2000-02-26	0	2.67	17.74
Jammu	32.69	74.84	2000-02-27	0	3.91	18.08
Jammu	32.69	74.84	2000-02-28	0	5.32	18.96
Jammu	32.69	74.84	2000-02-29	0	5.67	19.4
Jammu	32.69	74.84	2000-03-01	0	5.91	19.2
Jammu	32.69	74.84	2000-03-02	0.1594	5.05	19.49
Jammu	32.69	74.84	2000-03-03	0	5.16	20.92
Jammu	32.69	74.84	2000-03-04	0	7.55	21.52
Jammu	32.69	74.84	2000-03-05	15.079	5.47	15.6
Jammu	32.69	74.84	2000-03-06	0	5.12	16.6
Jammu	32.69	74.84	2000-03-07	0	4.56	18.24
Jammu	32.69	74.84	2000-03-08	0	4.75	18.57
Jammu	32.69	74.84	2000-03-09	0	5.41	19
Jammu	32.69	74.84	2000-03-10	0	5.82	20.65
Jammu	32.69	74.84	2000-03-11	0	8.14	21.39
Jammu	32.69	74.84	2000-03-12	0	7.86	21.79
Jammu	32.69	74.84	2000-03-13	0.388	4.69	18.83
Jammu	32.69	74.84	2000-03-14	0	4.47	19.45
Jammu	32.69	74.84	2000-03-15	0	6.27	20.66
Jammu	32.69	74.84	2000-03-16	0	7.62	21.69
Jammu	32.69	74.84	2000-03-17	0	8.54	21.98
Jammu	32.69	74.84	2000-03-18	0.9189	5.96	20.24
Jammu	32.69	74.84	2000-03-19	0	5.52	19.57
Jammu	32.69	74.84	2000-03-20	0	5.09	20.54
Jammu	32.69	74.84	2000-03-21	0	8.16	20.02
Jammu	32.69	74.84	2000-03-22	3.0215	8.12	17.52
Jammu	32.69	74.84	2000-03-23	0.8039	7.23	19.34
Jammu	32.69	74.84	2000-03-24	0	6.36	20.23
Jammu	32.69	74.84	2000-03-25	0	8.8	22.63
Jammu	32.69	74.84	2000-03-26	0	9.63	25.95
Jammu	32.69	74.84	2000-03-27	0	10.69	27.31
Jammu	32.69	74.84	2000-03-28	0	12.31	27.4
Jammu	32.69	74.84	2000-03-29	0	13.26	27.95
Jammu	32.69	74.84	2000-03-30	0	12.67	26.97
Jammu	32.69	74.84	2000-03-31	0	13.53	27
Jammu	32.69	74.84	2000-04-01	0	11.99	25.59
Jammu	32.69	74.84	2000-04-02	0	10.92	25.34
Jammu	32.69	74.84	2000-04-03	0	11.09	27.58
Jammu	32.69	74.84	2000-04-04	0	11.01	29.02
Jammu	32.69	74.84	2000-04-05	0	11.2	28.99
Jammu	32.69	74.84	2000-04-06	0	9.94	28.27
Jammu	32.69	74.84	2000-04-07	0	11.66	29.45
Jammu	32.69	74.84	2000-04-08	0	13.01	27.83
Jammu	32.69	74.84	2000-04-09	0	12.05	28.29
Jammu	32.69	74.84	2000-04-10	0	11.66	29.01
Jammu	32.69	74.84	2000-04-11	0	12.3	31.2
Jammu	32.69	74.84	2000-04-12	0	13.75	32.19
Jammu	32.69	74.84	2000-04-13	0	14.66	33.15
Jammu	32.69	74.84	2000-04-14	0	16.16	33.07
Jammu	32.69	74.84	2000-04-15	1.1392	13.62	28.54
Jammu	32.69	74.84	2000-04-16	0	14.04	29.23
Jammu	32.69	74.84	2000-04-17	0	14.98	31.43
Jammu	32.69	74.84	2000-04-18	0	16.6	32.09
Jammu	32.69	74.84	2000-04-19	0	16.96	32.06
Jammu	32.69	74.84	2000-04-20	0	17.59	33.03
Jammu	32.69	74.84	2000-04-21	0	16.93	32.34
Jammu	32.69	74.84	2000-04-22	0.8318	16.64	32.75
Jammu	32.69	74.84	2000-04-23	0	15.45	28.51
Jammu	32.69	74.84	2000-04-24	0.7301	15.22	29.97
Jammu	32.69	74.84	2000-04-25	0	16.43	31.87
Jammu	32.69	74.84	2000-04-26	0	18.33	33.86
Jammu	32.69	74.84	2000-04-27	0.4358	17.54	31.63
Jammu	32.69	74.84	2000-04-28	0.1966	15.44	30.55
Jammu	32.69	74.84	2000-04-29	0	14.55	30.67
Jammu	32.69	74.84	2000-04-30	0	15.55	31.41
Jammu	32.69	74.84	2000-05-01	0	15.65	33.73
Jammu	32.69	74.84	2000-05-02	0	15.81	35.24
Jammu	32.69	74.84	2000-05-03	0	18	37.45
Jammu	32.69	74.84	2000-05-04	0	20.81	37.22
Jammu	32.69	74.84	2000-05-05	0	18.14	34.7
Jammu	32.69	74.84	2000-05-06	0	16.84	32.82
Jammu	32.69	74.84	2000-05-07	0	17.55	30.94
Jammu	32.69	74.84	2000-05-08	0	18.91	31.89
Jammu	32.69	74.84	2000-05-09	0	20.57	33.93
Jammu	32.69	74.84	2000-05-10	0	22.12	34.98
Jammu	32.69	74.84	2000-05-11	0	22.98	35.91
Jammu	32.69	74.84	2000-05-12	0	22.73	34.64
Jammu	32.69	74.84	2000-05-13	1.0439	19.37	35.46
Jammu	32.69	74.84	2000-05-14	0	20.24	30.74
Jammu	32.69	74.84	2000-05-15	0	22.08	33.8
Jammu	32.69	74.84	2000-05-16	0.7466	18.32	35.03
Jammu	32.69	74.84	2000-05-17	0	21	34.57
Jammu	32.69	74.84	2000-05-18	10.8321	19.24	35.61
Jammu	32.69	74.84	2000-05-19	1.7996	20.79	35.93
Jammu	32.69	74.84	2000-05-20	0	21.96	35.44
Jammu	32.69	74.84	2000-05-21	0	20.75	35.88
Jammu	32.69	74.84	2000-05-22	0	22.46	36.83
Jammu	32.69	74.84	2000-05-23	3.9326	20.7	35.65
Jammu	32.69	74.84	2000-05-24	0	21.12	32.83
Jammu	32.69	74.84	2000-05-25	0	22.18	34.5
Jammu	32.69	74.84	2000-05-26	0	19.83	35.73
Jammu	32.69	74.84	2000-05-27	0	22.05	35.22
Jammu	32.69	74.84	2000-05-28	0	19	36.64
Jammu	32.69	74.84	2000-05-29	0	22.9	36.72
Jammu	32.69	74.84	2000-05-30	0	19.62	36.57
Jammu	32.69	74.84	2000-05-31	11.558	17.68	33.12
Jammu	32.69	74.84	2000-06-01	0	19.54	31.79
Jammu	32.69	74.84	2000-06-02	0	20.56	33.56
Jammu	32.69	74.84	2000-06-03	0	20.37	35.25
Jammu	32.69	74.84	2000-06-04	35.3072	17.85	34.56
Jammu	32.69	74.84	2000-06-05	0.3207	17.36	29.66
Jammu	32.69	74.84	2000-06-06	0	19.35	34.02
Jammu	32.69	74.84	2000-06-07	11.0897	19.6	34.94
Jammu	32.69	74.84	2000-06-08	2.9485	18.89	31.32
Jammu	32.69	74.84	2000-06-09	18.6418	18.17	30.27
Jammu	32.69	74.84	2000-06-10	6.4228	19	29.96
Jammu	32.69	74.84	2000-06-11	0.9833	17.79	28.95
Jammu	32.69	74.84	2000-06-12	0	19.83	32.99
Jammu	32.69	74.84	2000-06-13	0	21.86	34.96
Jammu	32.69	74.84	2000-06-14	0	23.42	35.33
Jammu	32.69	74.84	2000-06-15	9.1217	22.64	35.94
Jammu	32.69	74.84	2000-06-16	0	23.29	35.89
Jammu	32.69	74.84	2000-06-17	52.3503	22.3	35.1
Jammu	32.69	74.84	2000-06-18	0	23.93	35.84
Jammu	32.69	74.84	2000-06-19	0	24.82	36.08
Jammu	32.69	74.84	2000-06-20	9.6339	23.08	35.12
Jammu	32.69	74.84	2000-06-21	34.9365	21.87	34.37
Jammu	32.69	74.84	2000-06-22	6.2472	21.11	34.09
Jammu	32.69	74.84	2000-06-23	7.2816	20.17	31.44
Jammu	32.69	74.84	2000-06-24	0	20.55	32.19
Jammu	32.69	74.84	2000-06-25	0.1966	22.4	34.23
Jammu	32.69	74.84	2000-06-26	0.7863	23.37	34.65
Jammu	32.69	74.84	2000-06-27	0.4334	21.88	34.2
Jammu	32.69	74.84	2000-06-28	0.9828	24.21	33.74
Jammu	32.69	74.84	2000-06-29	0.4204	22.94	32.45
Jammu	32.69	74.84	2000-06-30	62.188	21.76	34.51
Jammu	32.69	74.84	2000-07-01	0.3554	21.26	30.06
Jammu	32.69	74.84	2000-07-02	0	20.68	30.74
Jammu	32.69	74.84	2000-07-03	0	21.14	31.33
Jammu	32.69	74.84	2000-07-04	0	21.14	32.63
Jammu	32.69	74.84	2000-07-05	0	22.24	33.3
Jammu	32.69	74.84	2000-07-06	0	22.88	34.5
Jammu	32.69	74.84	2000-07-07	0	23.47	35.49
Jammu	32.69	74.84	2000-07-08	4.4227	22.53	35.03
Jammu	32.69	74.84	2000-07-09	66.8985	21.92	33.98
Jammu	32.69	74.84	2000-07-10	0.8052	21.67	31
Jammu	32.69	74.84	2000-07-11	0	21.8	33.22
Jammu	32.69	74.84	2000-07-12	2.1646	22.1	31.65
Jammu	32.69	74.84	2000-07-13	5.8878	22.1	31.68
Jammu	32.69	74.84	2000-07-14	6.5401	21.84	30.4
Jammu	32.69	74.84	2000-07-15	0.8257	22.06	28.8
Jammu	32.69	74.84	2000-07-16	110.326	21.63	31.81
Jammu	32.69	74.84	2000-07-17	0	21.38	30.55
Jammu	32.69	74.84	2000-07-18	0	20.54	29.3
Jammu	32.69	74.84	2000-07-19	0.1335	22.14	30.69
Jammu	32.69	74.84	2000-07-20	1.4021	22.06	30.67
Jammu	32.69	74.84	2000-07-21	0.5158	22.87	31.49
Jammu	32.69	74.84	2000-07-22	25.2704	22	29.93
Jammu	32.69	74.84	2000-07-23	20.3028	20.51	26.46
Jammu	32.69	74.84	2000-07-24	0	21.7	28.62
Jammu	32.69	74.84	2000-07-25	8.0658	21.33	27.29
Jammu	32.69	74.84	2000-07-26	1.232	21.51	28.79
Jammu	32.69	74.84	2000-07-27	18.9194	22.65	31.17
Jammu	32.69	74.84	2000-07-28	27.7333	22.76	31.52
Jammu	32.69	74.84	2000-07-29	1.7691	22.35	29.64
Jammu	32.69	74.84	2000-07-30	8.5703	23.28	30.5
Jammu	32.69	74.84	2000-07-31	6.307	22.59	29.72
Jammu	32.69	74.84	2000-08-01	0.9739	21.08	28.24
Jammu	32.69	74.84	2000-08-02	25.5869	19.94	27.86
Jammu	32.69	74.84	2000-08-03	0.1007	18.67	27.87
Jammu	32.69	74.84	2000-08-04	0	19.69	28.42
Jammu	32.69	74.84	2000-08-05	0	20.29	30.73
Jammu	32.69	74.84	2000-08-06	0	21.63	31.74
Jammu	32.69	74.84	2000-08-07	0	23.17	32.11
Jammu	32.69	74.84	2000-08-08	0	22.53	32.84
Jammu	32.69	74.84	2000-08-09	0	22.75	33.51
Jammu	32.69	74.84	2000-08-10	14.478	22.1	31.53
Jammu	32.69	74.84	2000-08-11	6.0124	21.01	29.43
Jammu	32.69	74.84	2000-08-12	6.3065	21.56	30.17
Jammu	32.69	74.84	2000-08-13	0	21.54	30.59
Jammu	32.69	74.84	2000-08-14	0	22.62	32.41
Jammu	32.69	74.84	2000-08-15	3.2702	20.99	32.32
Jammu	32.69	74.84	2000-08-16	0	22.12	30.88
Jammu	32.69	74.84	2000-08-17	37.544	21.89	31.69
Jammu	32.69	74.84	2000-08-18	0.1665	22.19	32.13
Jammu	32.69	74.84	2000-08-19	8.3029	21.24	32.47
Jammu	32.69	74.84	2000-08-20	0	20.68	30.8
Jammu	32.69	74.84	2000-08-21	3.145	20.56	32.09
Jammu	32.69	74.84	2000-08-22	0	20.79	31.49
Jammu	32.69	74.84	2000-08-23	64.9671	20.19	29.08
Jammu	32.69	74.84	2000-08-24	1.9816	19.91	30.49
Jammu	32.69	74.84	2000-08-25	0	21.38	31.49
Jammu	32.69	74.84	2000-08-26	0	21.81	32.1
Jammu	32.69	74.84	2000-08-27	52.8808	22.54	32.63
Jammu	32.69	74.84	2000-08-28	22.6056	22.65	32.57
Jammu	32.69	74.84	2000-08-29	34.5865	22.1	32.93
Jammu	32.69	74.84	2000-08-30	20.8372	22.53	31.44
Jammu	32.69	74.84	2000-08-31	1.5725	21.86	31.04
Jammu	32.69	74.84	2000-09-01	27.5586	19.92	29.92
Jammu	32.69	74.84	2000-09-02	0.3931	20.59	29.42
Jammu	32.69	74.84	2000-09-03	0	21.48	32.15
Jammu	32.69	74.84	2000-09-04	0	21.72	33.19
Jammu	32.69	74.84	2000-09-05	6.888	21.05	33.68
Jammu	32.69	74.84	2000-09-06	32.2367	20.35	32.77
Jammu	32.69	74.84	2000-09-07	2.5647	20.59	32.34
Jammu	32.69	74.84	2000-09-08	1.5243	19.77	31.32
Jammu	32.69	74.84	2000-09-09	4.3449	19.19	31.21
Jammu	32.69	74.84	2000-09-10	7.0764	17.19	28.49
Jammu	32.69	74.84	2000-09-11	0	17.1	30.15
Jammu	32.69	74.84	2000-09-12	0	18.37	30.87
Jammu	32.69	74.84	2000-09-13	0	19.36	32.05
Jammu	32.69	74.84	2000-09-14	0	19.59	32.82
Jammu	32.69	74.84	2000-09-15	0	18.54	32.54
Jammu	32.69	74.84	2000-09-16	0	19.25	33.19
Jammu	32.69	74.84	2000-09-17	0	20.42	33.21
Jammu	32.69	74.84	2000-09-18	0	21.08	33.35
Jammu	32.69	74.84	2000-09-19	0	20.85	32.63
Jammu	32.69	74.84	2000-09-20	0.1161	19.29	30.54
Jammu	32.69	74.84	2000-09-21	0	15.67	27.17
Jammu	32.69	74.84	2000-09-22	19.4707	17.05	27.19
Jammu	32.69	74.84	2000-09-23	0	16.12	27.77
Jammu	32.69	74.84	2000-09-24	0	15.41	29.28
Jammu	32.69	74.84	2000-09-25	0	15.62	30.22
Jammu	32.69	74.84	2000-09-26	13.6026	15.14	30.48
Jammu	32.69	74.84	2000-09-27	0	14.64	25.4
Jammu	32.69	74.84	2000-09-28	0	14.16	28.33
Jammu	32.69	74.84	2000-09-29	0	14.05	29.09
Jammu	32.69	74.84	2000-09-30	0	14.29	30.22
Jammu	32.69	74.84	2000-10-01	0	15.69	30.05
Jammu	32.69	74.84	2000-10-02	0	16.25	30.59
Jammu	32.69	74.84	2000-10-03	0	16.02	29.93
Jammu	32.69	74.84	2000-10-04	0	15.51	31.05
Jammu	32.69	74.84	2000-10-05	0	16.34	31.96
Jammu	32.69	74.84	2000-10-06	0	17.81	31.58
Jammu	32.69	74.84	2000-10-07	0	16.75	30.74
Jammu	32.69	74.84	2000-10-08	0	15.68	30.48
Jammu	32.69	74.84	2000-10-09	0	14.67	30.27
Jammu	32.69	74.84	2000-10-10	0	13.72	30.06
Jammu	32.69	74.84	2000-10-11	0	12.99	29.23
Jammu	32.69	74.84	2000-10-12	0	12.7	29.96
Jammu	32.69	74.84	2000-10-13	0	12.42	29.96
Jammu	32.69	74.84	2000-10-14	0	11.89	29.25
Jammu	32.69	74.84	2000-10-15	0	11.6	29.56
Jammu	32.69	74.84	2000-10-16	0	12.06	30.18
Jammu	32.69	74.84	2000-10-17	0	12.4	31.2
Jammu	32.69	74.84	2000-10-18	0	12.88	31.45
Jammu	32.69	74.84	2000-10-19	0	13.19	31.37
Jammu	32.69	74.84	2000-10-20	0	13.88	31.27
Jammu	32.69	74.84	2000-10-21	0	13.4	30.53
Jammu	32.69	74.84	2000-10-22	0	13.42	30.39
Jammu	32.69	74.84	2000-10-23	0	13.24	29.81
Jammu	32.69	74.84	2000-10-24	0	12.59	29.68
Jammu	32.69	74.84	2000-10-25	0	11.7	29.18
Jammu	32.69	74.84	2000-10-26	0	11.66	29.26
Jammu	32.69	74.84	2000-10-27	0	11.29	28.73
Jammu	32.69	74.84	2000-10-28	0	11.41	29.24
Jammu	32.69	74.84	2000-10-29	0	10.9	30.1
Jammu	32.69	74.84	2000-10-30	0	11.29	28.85
Jammu	32.69	74.84	2000-10-31	0	10.86	27.93
Jammu	32.69	74.84	2000-11-01	0	12.07	27.07
Jammu	32.69	74.84	2000-11-02	0	12.37	26.97
Jammu	32.69	74.84	2000-11-03	0	11.93	26.62
Jammu	32.69	74.84	2000-11-04	0	11.22	26.63
Jammu	32.69	74.84	2000-11-05	0	11.07	26.75
Jammu	32.69	74.84	2000-11-06	0	10.75	26.15
Jammu	32.69	74.84	2000-11-07	0	10.39	26.26
Jammu	32.69	74.84	2000-11-08	0	10.76	26.46
Jammu	32.69	74.84	2000-11-09	0	10.48	23.84
Jammu	32.69	74.84	2000-11-10	0	8.89	25.64
Jammu	32.69	74.84	2000-11-11	0	10.32	24.78
Jammu	32.69	74.84	2000-11-12	0	8.59	23.5
Jammu	32.69	74.84	2000-11-13	0	10.47	24.23
Jammu	32.69	74.84	2000-11-14	0.4345	8.58	22.25
Jammu	32.69	74.84	2000-11-15	0	6.59	21.9
Jammu	32.69	74.84	2000-11-16	0	6.99	22.84
Jammu	32.69	74.84	2000-11-17	0	7.32	23.1
Jammu	32.69	74.84	2000-11-18	0	8.53	23.07
Jammu	32.69	74.84	2000-11-19	0	6.63	21.02
Jammu	32.69	74.84	2000-11-20	0	5.5	22.39
Jammu	32.69	74.84	2000-11-21	0	7.13	23
Jammu	32.69	74.84	2000-11-22	0	8.42	21.11
Jammu	32.69	74.84	2000-11-23	0	9.92	19.35
Jammu	32.69	74.84	2000-11-24	3.6149	9.25	20.25
Jammu	32.69	74.84	2000-11-25	0	6	20.04
Jammu	32.69	74.84	2000-11-26	0	5.32	20.28
Jammu	32.69	74.84	2000-11-27	0	6.07	18.32
Jammu	32.69	74.84	2000-11-28	0	4.55	18.43
Jammu	32.69	74.84	2000-11-29	0	3.38	18.39
Jammu	32.69	74.84	2000-11-30	0	2.51	18.69
Jammu	32.69	74.84	2000-12-01	0	2.05	18.14
Jammu	32.69	74.84	2000-12-02	0	1.38	17.9
Jammu	32.69	74.84	2000-12-03	0	2.83	18.99
Jammu	32.69	74.84	2000-12-04	0	3.09	20.4
Jammu	32.69	74.84	2000-12-05	0	2.5	20.51
Jammu	32.69	74.84	2000-12-06	0	2.6	20.03
Jammu	32.69	74.84	2000-12-07	0	2.74	19.3
Jammu	32.69	74.84	2000-12-08	0	4.57	17.75
Jammu	32.69	74.84	2000-12-09	0	4	17.09
Jammu	32.69	74.84	2000-12-10	0	3.54	16.49
Jammu	32.69	74.84	2000-12-11	0	2.48	16.15
Jammu	32.69	74.84	2000-12-12	0	2.02	17.51
Jammu	32.69	74.84	2000-12-13	0	3.02	18.07
Jammu	32.69	74.84	2000-12-14	0	3.6	19.38
Jammu	32.69	74.84	2000-12-15	0	4.57	19.83
Jammu	32.69	74.84	2000-12-16	0	6.82	19.13
Jammu	32.69	74.84	2000-12-17	0	7.84	16.23
Jammu	32.69	74.84	2000-12-18	1.0145	6.59	17.22
Jammu	32.69	74.84	2000-12-19	0.1322	4.37	16.29
Jammu	32.69	74.84	2000-12-20	0	3.84	17.33
Jammu	32.69	74.84	2000-12-21	0	2.94	18.73
Jammu	32.69	74.84	2000-12-22	0	2.99	18.55
Jammu	32.69	74.84	2000-12-23	0	2.48	18.52
Jammu	32.69	74.84	2000-12-24	0	2.65	19.07
Jammu	32.69	74.84	2000-12-25	0	2.6	19.2
Jammu	32.69	74.84	2000-12-26	0	2.38	18.89
Jammu	32.69	74.84	2000-12-27	0	2.01	18.99
Jammu	32.69	74.84	2000-12-28	0	3.22	18.55
Jammu	32.69	74.84	2000-12-29	0	4.13	16
Jammu	32.69	74.84	2000-12-30	0	3.46	17.2
Jammu	32.69	74.84	2000-12-31	0	4.34	17.2
Jammu	32.69	74.84	2001-01-01	5.3077	5.7	14.04
Jammu	32.69	74.84	2001-01-02	0.8845	2.87	13.84
Jammu	32.69	74.84	2001-01-03	0	2.37	14.63
Jammu	32.69	74.84	2001-01-04	0.2948	2.01	13.32
Jammu	32.69	74.84	2001-01-05	0	2.41	14.41
Jammu	32.69	74.84	2001-01-06	0	1.88	14.52
Jammu	32.69	74.84	2001-01-07	0	0.83	14.22
Jammu	32.69	74.84	2001-01-08	0	-0.33	15.1
Jammu	32.69	74.84	2001-01-09	0	-0.66	14.63
Jammu	32.69	74.84	2001-01-10	0	-0.58	15.96
Jammu	32.69	74.84	2001-01-11	0	0.17	16.69
Jammu	32.69	74.84	2001-01-12	0	2.89	16.08
Jammu	32.69	74.84	2001-01-13	0	0.25	15.88
Jammu	32.69	74.84	2001-01-14	0	0.52	16.52
Jammu	32.69	74.84	2001-01-15	0	0.48	15.68
Jammu	32.69	74.84	2001-01-16	0	1.07	16.35
Jammu	32.69	74.84	2001-01-17	0	2.18	15.89
Jammu	32.69	74.84	2001-01-18	0	2.45	15.14
Jammu	32.69	74.84	2001-01-19	0	2.56	17.98
Jammu	32.69	74.84	2001-01-20	0	0.48	18.09
Jammu	32.69	74.84	2001-01-21	0	1.12	18.96
Jammu	32.69	74.84	2001-01-22	0.1257	2.71	16.48
Jammu	32.69	74.84	2001-01-23	8.1082	0.8	11.33
Jammu	32.69	74.84	2001-01-24	0	-0.12	12.51
Jammu	32.69	74.84	2001-01-25	0	-0.48	13.77
Jammu	32.69	74.84	2001-01-26	0	0.29	15.47
Jammu	32.69	74.84	2001-01-27	0	0.33	17.7
Jammu	32.69	74.84	2001-01-28	0	0.96	19.17
Jammu	32.69	74.84	2001-01-29	0	2.06	20.08
Jammu	32.69	74.84	2001-01-30	0	3.49	20.89
Jammu	32.69	74.84	2001-01-31	0	5.2	21.72
Jammu	32.69	74.84	2001-02-01	0	1.81	20.08
Jammu	32.69	74.84	2001-02-02	0	1.05	19.5
Jammu	32.69	74.84	2001-02-03	0	1.03	18.42
Jammu	32.69	74.84	2001-02-04	0	0.96	19.15
Jammu	32.69	74.84	2001-02-05	0	1.36	18.71
Jammu	32.69	74.84	2001-02-06	0	1.37	18.36
Jammu	32.69	74.84	2001-02-07	0	1.75	19.73
Jammu	32.69	74.84	2001-02-08	0	2.66	19.89
Jammu	32.69	74.84	2001-02-09	0	2.66	20.12
Jammu	32.69	74.84	2001-02-10	0	1.88	21.71
Jammu	32.69	74.84	2001-02-11	0	1.85	21.72
Jammu	32.69	74.84	2001-02-12	0	2.73	20.86
Jammu	32.69	74.84	2001-02-13	0	3.26	20.32
Jammu	32.69	74.84	2001-02-14	0	5.66	19.36
Jammu	32.69	74.84	2001-02-15	5.4651	5.8	16.9
Jammu	32.69	74.84	2001-02-16	0	7.11	19.32
Jammu	32.69	74.84	2001-02-17	0	7.85	18.7
Jammu	32.69	74.84	2001-02-18	0	6.81	19.66
Jammu	32.69	74.84	2001-02-19	0	6.57	23.21
Jammu	32.69	74.84	2001-02-20	0	8.2	23.01
Jammu	32.69	74.84	2001-02-21	0.8535	5.72	17.89
Jammu	32.69	74.84	2001-02-22	0	6.69	21.07
Jammu	32.69	74.84	2001-02-23	0.2843	8.06	20.23
Jammu	32.69	74.84	2001-02-24	0.4612	8.89	20.15
Jammu	32.69	74.84	2001-02-25	0	7.81	21.4
Jammu	32.69	74.84	2001-02-26	3.7415	3.95	16.65
Jammu	32.69	74.84	2001-02-27	0	4.25	17.19
Jammu	32.69	74.84	2001-02-28	0	5.45	19.14
Jammu	32.69	74.84	2001-03-01	0	4.41	18.63
Jammu	32.69	74.84	2001-03-02	0	4.69	19.11
Jammu	32.69	74.84	2001-03-03	0	6.14	21.12
Jammu	32.69	74.84	2001-03-04	0	5.45	21.59
Jammu	32.69	74.84	2001-03-05	0	6.35	22.24
Jammu	32.69	74.84	2001-03-06	0	6.7	23.53
Jammu	32.69	74.84	2001-03-07	0	7.4	23.91
Jammu	32.69	74.84	2001-03-08	0	6.81	23.65
Jammu	32.69	74.84	2001-03-09	0	7.43	23.66
Jammu	32.69	74.84	2001-03-10	0	7.32	23.88
Jammu	32.69	74.84	2001-03-11	0	7.69	24.15
Jammu	32.69	74.84	2001-03-12	0	8.88	25.91
Jammu	32.69	74.84	2001-03-13	0	10.92	25.99
Jammu	32.69	74.84	2001-03-14	0.4285	7.8	21.43
Jammu	32.69	74.84	2001-03-15	0.1962	7.46	20.83
Jammu	32.69	74.84	2001-03-16	0	7.25	22.04
Jammu	32.69	74.84	2001-03-17	0	7.97	23.82
Jammu	32.69	74.84	2001-03-18	0	8.6	25.31
Jammu	32.69	74.84	2001-03-19	0	12.26	26.98
Jammu	32.69	74.84	2001-03-20	5.5069	11.08	25.39
Jammu	32.69	74.84	2001-03-21	6.6823	10.45	22.79
Jammu	32.69	74.84	2001-03-22	7.6082	7.94	20.34
Jammu	32.69	74.84	2001-03-23	0	7.73	22.18
Jammu	32.69	74.84	2001-03-24	0	8.59	23.46
Jammu	32.69	74.84	2001-03-25	0	9.97	25.74
Jammu	32.69	74.84	2001-03-26	0	10.29	26.78
Jammu	32.69	74.84	2001-03-27	0	11.31	27.67
Jammu	32.69	74.84	2001-03-28	0	14.37	28.51
Jammu	32.69	74.84	2001-03-29	4.3449	10.53	23.53
Jammu	32.69	74.84	2001-03-30	0.8254	9	21.53
Jammu	32.69	74.84	2001-03-31	0	9.99	20.41
Jammu	32.69	74.84	2001-04-01	0	9.96	23.38
Jammu	32.69	74.84	2001-04-02	0	10.16	25.36
Jammu	32.69	74.84	2001-04-03	1.4992	11.28	26.76
Jammu	32.69	74.84	2001-04-04	2.329	10.99	24.5
Jammu	32.69	74.84	2001-04-05	0	11.26	25.37
Jammu	32.69	74.84	2001-04-06	0	11.78	28.53
Jammu	32.69	74.84	2001-04-07	0	12.41	30.13
Jammu	32.69	74.84	2001-04-08	0	13.48	31.3
Jammu	32.69	74.84	2001-04-09	0	14.09	31.45
Jammu	32.69	74.84	2001-04-10	0	16.11	30.08
Jammu	32.69	74.84	2001-04-11	0	16.05	28.31
Jammu	32.69	74.84	2001-04-12	0	15.06	29.31
Jammu	32.69	74.84	2001-04-13	0.3323	13.78	28.02
Jammu	32.69	74.84	2001-04-14	0.4335	13.77	24.75
Jammu	32.69	74.84	2001-04-15	0	13.76	23.97
Jammu	32.69	74.84	2001-04-16	30.0662	14.87	26.39
Jammu	32.69	74.84	2001-04-17	1.5311	13.43	23.03
Jammu	32.69	74.84	2001-04-18	2.9671	11.62	20.43
Jammu	32.69	74.84	2001-04-19	0	12.65	21.58
Jammu	32.69	74.84	2001-04-20	13.1934	11	23
Jammu	32.69	74.84	2001-04-21	0	11.64	24.05
Jammu	32.69	74.84	2001-04-22	0	12.68	27.58
Jammu	32.69	74.84	2001-04-23	0	13.98	30.96
Jammu	32.69	74.84	2001-04-24	0	16.05	32.97
Jammu	32.69	74.84	2001-04-25	0	16.3	30.68
Jammu	32.69	74.84	2001-04-26	0	16.49	31.41
Jammu	32.69	74.84	2001-04-27	0	16.4	31.84
Jammu	32.69	74.84	2001-04-28	0	17.55	32.35
Jammu	32.69	74.84	2001-04-29	0	16.93	31.94
Jammu	32.69	74.84	2001-04-30	0	17.64	34.14
Jammu	32.69	74.84	2001-05-01	0	18.52	35.39
Jammu	32.69	74.84	2001-05-02	0	17.12	30.65
Jammu	32.69	74.84	2001-05-03	0.1027	17.52	31.06
Jammu	32.69	74.84	2001-05-04	0	16.65	32.7
Jammu	32.69	74.84	2001-05-05	0	18.52	34.21
Jammu	32.69	74.84	2001-05-06	0	20.53	34.83
Jammu	32.69	74.84	2001-05-07	0	20.41	37.41
Jammu	32.69	74.84	2001-05-08	7.0145	18.98	35.46
Jammu	32.69	74.84	2001-05-09	0	18.77	33.06
Jammu	32.69	74.84	2001-05-10	0	19.95	35.44
Jammu	32.69	74.84	2001-05-11	0	20.65	38.18
Jammu	32.69	74.84	2001-05-12	0	21.46	39.58
Jammu	32.69	74.84	2001-05-13	0	22.26	38.13
Jammu	32.69	74.84	2001-05-14	0	21.2	37.78
Jammu	32.69	74.84	2001-05-15	1.8017	19.68	35.13
Jammu	32.69	74.84	2001-05-16	0	18.03	32.01
Jammu	32.69	74.84	2001-05-17	0	17.72	32.44
Jammu	32.69	74.84	2001-05-18	0	18.31	32.22
Jammu	32.69	74.84	2001-05-19	0	20.29	31.61
Jammu	32.69	74.84	2001-05-20	26.7839	17.2	32.97
Jammu	32.69	74.84	2001-05-21	0	18.55	27.43
Jammu	32.69	74.84	2001-05-22	0	18.16	31.03
Jammu	32.69	74.84	2001-05-23	0	18.41	32.46
Jammu	32.69	74.84	2001-05-24	0	19.89	34.56
Jammu	32.69	74.84	2001-05-25	2.1904	19.02	35.86
Jammu	32.69	74.84	2001-05-26	0.6629	19.32	35.7
Jammu	32.69	74.84	2001-05-27	0	19.91	34.99
Jammu	32.69	74.84	2001-05-28	0	19.96	35.68
Jammu	32.69	74.84	2001-05-29	5.249	17.63	33.69
Jammu	32.69	74.84	2001-05-30	0	19.71	31.94
Jammu	32.69	74.84	2001-05-31	0	20.96	34.05
Jammu	32.69	74.84	2001-06-01	0	23.02	35.43
Jammu	32.69	74.84	2001-06-02	0	22.67	36.4
Jammu	32.69	74.84	2001-06-03	28.8484	20.61	35.76
Jammu	32.69	74.84	2001-06-04	0	19.91	33.94
Jammu	32.69	74.84	2001-06-05	3.8402	19.13	32.43
Jammu	32.69	74.84	2001-06-06	0	19.08	28.8
Jammu	32.69	74.84	2001-06-07	0.1024	19.01	31.34
Jammu	32.69	74.84	2001-06-08	1.376	19.21	31.41
Jammu	32.69	74.84	2001-06-09	2.3796	20.07	33.14
Jammu	32.69	74.84	2001-06-10	8.5506	21.64	32.58
Jammu	32.69	74.84	2001-06-11	0	23.27	34.8
Jammu	32.69	74.84	2001-06-12	24.1799	23.78	36.04
Jammu	32.69	74.84	2001-06-13	2.5607	23.28	33.37
Jammu	32.69	74.84	2001-06-14	90.7782	21.16	34.72
Jammu	32.69	74.84	2001-06-15	0	21.27	31.04
Jammu	32.69	74.84	2001-06-16	0.8845	21.29	29.58
Jammu	32.69	74.84	2001-06-17	59.196	19.02	30.68
Jammu	32.69	74.84	2001-06-18	0	19.74	27.19
Jammu	32.69	74.84	2001-06-19	0	20.2	31.53
Jammu	32.69	74.84	2001-06-20	0	21.78	33.52
Jammu	32.69	74.84	2001-06-21	3.9313	22.24	34.59
Jammu	32.69	74.84	2001-06-22	13.0185	21.04	34.45
Jammu	32.69	74.84	2001-06-23	0	20.8	29.86
Jammu	32.69	74.84	2001-06-24	2.3626	20.32	29.71
Jammu	32.69	74.84	2001-06-25	0	20.59	30.49
Jammu	32.69	74.84	2001-06-26	19.3165	21.21	32
Jammu	32.69	74.84	2001-06-27	0	21.17	31.44
Jammu	32.69	74.84	2001-06-28	0	23.59	34.04
Jammu	32.69	74.84	2001-06-29	0	24.55	35
Jammu	32.69	74.84	2001-06-30	16.1301	24.84	35.23
Jammu	32.69	74.84	2001-07-01	0.8466	23.03	31
Jammu	32.69	74.84	2001-07-02	0	24.4	33.06
Jammu	32.69	74.84	2001-07-03	82.465	22.16	33.77
Jammu	32.69	74.84	2001-07-04	0.5944	22.11	28.93
Jammu	32.69	74.84	2001-07-05	0	22.39	32.12
Jammu	32.69	74.84	2001-07-06	0	23.08	33.31
Jammu	32.69	74.84	2001-07-07	0.7863	23.6	33.82
Jammu	32.69	74.84	2001-07-08	9.6763	22.78	33.18
Jammu	32.69	74.84	2001-07-09	0	22.3	31.3
Jammu	32.69	74.84	2001-07-10	0	24.02	34.39
Jammu	32.69	74.84	2001-07-11	45.5883	22.61	34.36
Jammu	32.69	74.84	2001-07-12	1.0135	22.69	28.86
Jammu	32.69	74.84	2001-07-13	4.9141	22.56	31.1
Jammu	32.69	74.84	2001-07-14	0	22.11	30.66
Jammu	32.69	74.84	2001-07-15	22.2119	23.41	31.42
Jammu	32.69	74.84	2001-07-16	0.7888	22.33	30.48
Jammu	32.69	74.84	2001-07-17	8.48	20.69	29.18
Jammu	32.69	74.84	2001-07-18	0	20.22	28.85
Jammu	32.69	74.84	2001-07-19	0	21.55	32.8
Jammu	32.69	74.84	2001-07-20	0	23.49	34.28
Jammu	32.69	74.84	2001-07-21	31.1556	24.45	34.37
Jammu	32.69	74.84	2001-07-22	60.7506	24.07	32.69
Jammu	32.69	74.84	2001-07-23	28.0764	23.84	31.61
Jammu	32.69	74.84	2001-07-24	0.3314	22.94	30.43
Jammu	32.69	74.84	2001-07-25	8.1666	21.56	29.07
Jammu	32.69	74.84	2001-07-26	1.2777	22.44	30.15
Jammu	32.69	74.84	2001-07-27	0	22.48	30.27
Jammu	32.69	74.84	2001-07-28	11.6267	22.6	32.23
Jammu	32.69	74.84	2001-07-29	6.5959	21.75	30.71
Jammu	32.69	74.84	2001-07-30	63.7779	19.74	27.65
Jammu	32.69	74.84	2001-07-31	0.3246	19.73	28.26
Jammu	32.69	74.84	2001-08-01	0	20.72	30.46
Jammu	32.69	74.84	2001-08-02	0	21.72	32.55
Jammu	32.69	74.84	2001-08-03	0	22.79	32.63
Jammu	32.69	74.84	2001-08-04	72.8275	22.51	32.46
Jammu	32.69	74.84	2001-08-05	0	22.03	29.59
Jammu	32.69	74.84	2001-08-06	5.3325	22.17	31.76
Jammu	32.69	74.84	2001-08-07	93.3883	21.98	30.82
Jammu	32.69	74.84	2001-08-08	4.9086	21.36	29.44
Jammu	32.69	74.84	2001-08-09	0	22.14	31.97
Jammu	32.69	74.84	2001-08-10	1.6968	22.23	30.1
Jammu	32.69	74.84	2001-08-11	0	22.37	31.14
Jammu	32.69	74.84	2001-08-12	0	23.02	32.03
Jammu	32.69	74.84	2001-08-13	0	23.35	32.84
Jammu	32.69	74.84	2001-08-14	65.4957	23.12	32.88
Jammu	32.69	74.84	2001-08-15	0.9975	21.81	27.7
Jammu	32.69	74.84	2001-08-16	0	22.07	29.35
Jammu	32.69	74.84	2001-08-17	0	22.15	31.5
Jammu	32.69	74.84	2001-08-18	0	22.18	32.43
Jammu	32.69	74.84	2001-08-19	3.833	22.36	33.29
Jammu	32.69	74.84	2001-08-20	3.6365	22.69	33.27
Jammu	32.69	74.84	2001-08-21	0.3931	23.15	32.42
Jammu	32.69	74.84	2001-08-22	0	22.3	33.01
Jammu	32.69	74.84	2001-08-23	78.7075	20.9	31.09
Jammu	32.69	74.84	2001-08-24	0	19.6	29.49
Jammu	32.69	74.84	2001-08-25	0	20.26	30.21
Jammu	32.69	74.84	2001-08-26	0	21.25	31.98
Jammu	32.69	74.84	2001-08-27	0	21.52	32.97
Jammu	32.69	74.84	2001-08-28	1.1794	21.14	32.89
Jammu	32.69	74.84	2001-08-29	0	21.51	33.33
Jammu	32.69	74.84	2001-08-30	0	22.14	33.38
Jammu	32.69	74.84	2001-08-31	0	20.19	32.97
Jammu	32.69	74.84	2001-09-01	0	19.89	32.17
Jammu	32.69	74.84	2001-09-02	45.9963	19.72	32.56
Jammu	32.69	74.84	2001-09-03	15.5287	20.52	32.67
Jammu	32.69	74.84	2001-09-04	10.6187	20	32.37
Jammu	32.69	74.84	2001-09-05	0	19.37	31.94
Jammu	32.69	74.84	2001-09-06	1.011	17.37	31.23
Jammu	32.69	74.84	2001-09-07	0	18.69	31.75
Jammu	32.69	74.84	2001-09-08	32.8264	19.04	32.25
Jammu	32.69	74.84	2001-09-09	0	18.5	32.42
Jammu	32.69	74.84	2001-09-10	0	19.26	33.12
Jammu	32.69	74.84	2001-09-11	0	18.06	32.63
Jammu	32.69	74.84	2001-09-12	1.9633	18.3	32.6
Jammu	32.69	74.84	2001-09-13	19.6397	17.13	29.01
Jammu	32.69	74.84	2001-09-14	1.4074	16.41	30.36
Jammu	32.69	74.84	2001-09-15	8.9263	15.61	27.29
Jammu	32.69	74.84	2001-09-16	0	15.53	27.1
Jammu	32.69	74.84	2001-09-17	0	15.4	29.59
Jammu	32.69	74.84	2001-09-18	0	15.6	30.57
Jammu	32.69	74.84	2001-09-19	0	15.94	31.05
Jammu	32.69	74.84	2001-09-20	0	15.9	31.46
Jammu	32.69	74.84	2001-09-21	0	16.77	29.93
Jammu	32.69	74.84	2001-09-22	0	16.39	31.49
Jammu	32.69	74.84	2001-09-23	0	16.38	31.81
Jammu	32.69	74.84	2001-09-24	0	15.9	31.43
Jammu	32.69	74.84	2001-09-25	0	16.09	32.12
Jammu	32.69	74.84	2001-09-26	0	15.47	30.56
Jammu	32.69	74.84	2001-09-27	0	15.59	29.92
Jammu	32.69	74.84	2001-09-28	0	16.29	31.68
Jammu	32.69	74.84	2001-09-29	0	15.67	32.32
Jammu	32.69	74.84	2001-09-30	0	16.35	31.6
Jammu	32.69	74.84	2001-10-01	0	18.18	31.87
Jammu	32.69	74.84	2001-10-02	0.2289	18.03	29.25
Jammu	32.69	74.84	2001-10-03	0	18.04	30.89
Jammu	32.69	74.84	2001-10-04	0	17.85	31.06
Jammu	32.69	74.84	2001-10-05	0	14.95	28.93
Jammu	32.69	74.84	2001-10-06	0	15.17	30.42
Jammu	32.69	74.84	2001-10-07	0	15.37	31.39
Jammu	32.69	74.84	2001-10-08	0	15.6	31.67
Jammu	32.69	74.84	2001-10-09	0	16.15	31.7
Jammu	32.69	74.84	2001-10-10	0	16.27	31.79
Jammu	32.69	74.84	2001-10-11	0	14.53	30.2
Jammu	32.69	74.84	2001-10-12	0.1288	14.31	28.32
Jammu	32.69	74.84	2001-10-13	0	14.02	26.61
Jammu	32.69	74.84	2001-10-14	0	12.73	27.25
Jammu	32.69	74.84	2001-10-15	0	12.75	27.81
Jammu	32.69	74.84	2001-10-16	0	12.2	29
Jammu	32.69	74.84	2001-10-17	0	11.99	29.74
Jammu	32.69	74.84	2001-10-18	0	12.09	30.27
Jammu	32.69	74.84	2001-10-19	0	12.67	29.26
Jammu	32.69	74.84	2001-10-20	0	12.56	29.73
Jammu	32.69	74.84	2001-10-21	0	13.47	29.16
Jammu	32.69	74.84	2001-10-22	0	13.23	29.27
Jammu	32.69	74.84	2001-10-23	0	13.01	29.49
Jammu	32.69	74.84	2001-10-24	0	12.99	29.6
Jammu	32.69	74.84	2001-10-25	0	12.69	29.53
Jammu	32.69	74.84	2001-10-26	0	12.61	29.61
Jammu	32.69	74.84	2001-10-27	0	12.75	29.64
Jammu	32.69	74.84	2001-10-28	0	12.97	29.47
Jammu	32.69	74.84	2001-10-29	0	12.65	29.28
Jammu	32.69	74.84	2001-10-30	0	12.26	28.03
Jammu	32.69	74.84	2001-10-31	0	12.92	28.09
Jammu	32.69	74.84	2001-11-01	0	12.52	27.21
Jammu	32.69	74.84	2001-11-02	0	14.02	26.27
Jammu	32.69	74.84	2001-11-03	0	13.21	24.39
Jammu	32.69	74.84	2001-11-04	2.2466	10.51	19.69
Jammu	32.69	74.84	2001-11-05	0	9.38	21.07
Jammu	32.69	74.84	2001-11-06	0.1127	9.5	20.17
Jammu	32.69	74.84	2001-11-07	0	8.41	19.96
Jammu	32.69	74.84	2001-11-08	0	7.42	21.19
Jammu	32.69	74.84	2001-11-09	0	6.49	21.47
Jammu	32.69	74.84	2001-11-10	0	6.69	22.76
Jammu	32.69	74.84	2001-11-11	0	7.41	22.69
Jammu	32.69	74.84	2001-11-12	0	8.2	22.78
Jammu	32.69	74.84	2001-11-13	0	7.94	22.95
Jammu	32.69	74.84	2001-11-14	0	8.35	23.58
Jammu	32.69	74.84	2001-11-15	0	8	24.75
Jammu	32.69	74.84	2001-11-16	0	7.62	25.25
Jammu	32.69	74.84	2001-11-17	0	7.36	24.77
Jammu	32.69	74.84	2001-11-18	0	7.33	24.18
Jammu	32.69	74.84	2001-11-19	0	7.59	24.51
Jammu	32.69	74.84	2001-11-20	0	6.5	24.51
Jammu	32.69	74.84	2001-11-21	0	6.62	24.21
Jammu	32.69	74.84	2001-11-22	0	5.88	23.65
Jammu	32.69	74.84	2001-11-23	0	6.36	23.4
Jammu	32.69	74.84	2001-11-24	0	6.74	23.15
Jammu	32.69	74.84	2001-11-25	0	5.3	23.67
Jammu	32.69	74.84	2001-11-26	0	5.26	22.93
Jammu	32.69	74.84	2001-11-27	0	6.08	21.34
Jammu	32.69	74.84	2001-11-28	0	5.46	20.93
Jammu	32.69	74.84	2001-11-29	0	4.67	20.02
Jammu	32.69	74.84	2001-11-30	0	4.61	20.64
Jammu	32.69	74.84	2001-12-01	0	5.12	20.93
Jammu	32.69	74.84	2001-12-02	0	4.91	20.99
Jammu	32.69	74.84	2001-12-03	0	6.84	21.11
Jammu	32.69	74.84	2001-12-04	0	7.22	19.16
Jammu	32.69	74.84	2001-12-05	0	5.85	19.27
Jammu	32.69	74.84	2001-12-06	0	4.62	19.62
Jammu	32.69	74.84	2001-12-07	0	6.56	19.35
Jammu	32.69	74.84	2001-12-08	0	4.73	20.32
Jammu	32.69	74.84	2001-12-09	0	4.03	20.36
Jammu	32.69	74.84	2001-12-10	0	4.52	19.41
Jammu	32.69	74.84	2001-12-11	0	5.64	18.15
Jammu	32.69	74.84	2001-12-12	0	4.78	16.05
Jammu	32.69	74.84	2001-12-13	0	4.13	16.63
Jammu	32.69	74.84	2001-12-14	0	5.78	18.38
Jammu	32.69	74.84	2001-12-15	0.1925	6.93	14.31
Jammu	32.69	74.84	2001-12-16	0.9554	5.04	11.26
Jammu	32.69	74.84	2001-12-17	0	4.32	15
Jammu	32.69	74.84	2001-12-18	0	5.42	15.39
Jammu	32.69	74.84	2001-12-19	1.1691	4.45	15.97
Jammu	32.69	74.84	2001-12-20	0	3.37	15.17
Jammu	32.69	74.84	2001-12-21	0	2.36	15.94
Jammu	32.69	74.84	2001-12-22	0	2.82	16.66
Jammu	32.69	74.84	2001-12-23	0	2.63	17.34
Jammu	32.69	74.84	2001-12-24	0	2.83	17.98
Jammu	32.69	74.84	2001-12-25	0	2.98	18.11
Jammu	32.69	74.84	2001-12-26	0	3.49	17.91
Jammu	32.69	74.84	2001-12-27	0	2.67	16.25
Jammu	32.69	74.84	2001-12-28	0	2.54	16.42
Jammu	32.69	74.84	2001-12-29	0	2.73	14.09
Jammu	32.69	74.84	2001-12-30	0	2.25	13.53
Jammu	32.69	74.84	2001-12-31	0	2.25	12.77
Jammu	32.69	74.84	2002-01-01	0	1.91	12.86
Jammu	32.69	74.84	2002-01-02	0	0.92	13.22
Jammu	32.69	74.84	2002-01-03	0	1.12	14.1
Jammu	32.69	74.84	2002-01-04	0	0.58	15.41
Jammu	32.69	74.84	2002-01-05	0	1.23	16.18
Jammu	32.69	74.84	2002-01-06	0	1.4	16.2
Jammu	32.69	74.84	2002-01-07	0	1.11	16.96
Jammu	32.69	74.84	2002-01-08	0	1.84	17.24
Jammu	32.69	74.84	2002-01-09	0	2.49	18.08
Jammu	32.69	74.84	2002-01-10	0	2.52	17.57
Jammu	32.69	74.84	2002-01-11	0	2.62	18.16
Jammu	32.69	74.84	2002-01-12	0	3.53	18.57
Jammu	32.69	74.84	2002-01-13	0	5.98	19.3
Jammu	32.69	74.84	2002-01-14	0.2766	7.82	15.19
Jammu	32.69	74.84	2002-01-15	4.2851	6.75	12.82
Jammu	32.69	74.84	2002-01-16	0.4177	5.07	11.8
Jammu	32.69	74.84	2002-01-17	8.4856	3.1	12.29
Jammu	32.69	74.84	2002-01-18	0.2418	2.21	12.62
Jammu	32.69	74.84	2002-01-19	0	2.38	13.33
Jammu	32.69	74.84	2002-01-20	0.4947	2.1	13.72
Jammu	32.69	74.84	2002-01-21	0	1.54	12.76
Jammu	32.69	74.84	2002-01-22	0	0.73	13.8
Jammu	32.69	74.84	2002-01-23	0	1.33	14.41
Jammu	32.69	74.84	2002-01-24	0	1.34	15.35
Jammu	32.69	74.84	2002-01-25	0	1.91	15.41
Jammu	32.69	74.84	2002-01-26	0	2.76	14.08
Jammu	32.69	74.84	2002-01-27	0	2.03	13.2
Jammu	32.69	74.84	2002-01-28	0	-0.43	13.51
Jammu	32.69	74.84	2002-01-29	0	0.34	14.46
Jammu	32.69	74.84	2002-01-30	0	0.56	14.66
Jammu	32.69	74.84	2002-01-31	0	0.8	15.17
Jammu	32.69	74.84	2002-02-01	0	2.27	16.84
Jammu	32.69	74.84	2002-02-02	0	3.54	17.26
Jammu	32.69	74.84	2002-02-03	0	2.08	15.01
Jammu	32.69	74.84	2002-02-04	0	0.96	15.87
Jammu	32.69	74.84	2002-02-05	0	2.58	15.48
Jammu	32.69	74.84	2002-02-06	0	2.96	14.38
Jammu	32.69	74.84	2002-02-07	0.1046	4.17	14.55
Jammu	32.69	74.84	2002-02-08	5.1045	1.55	11.47
Jammu	32.69	74.84	2002-02-09	0.5109	0.87	11.09
Jammu	32.69	74.84	2002-02-10	0	-0.64	12.11
Jammu	32.69	74.84	2002-02-11	0	1.71	14.33
Jammu	32.69	74.84	2002-02-12	0	1.61	11.81
Jammu	32.69	74.84	2002-02-13	0	1.35	12.46
Jammu	32.69	74.84	2002-02-14	0	2.13	15.14
Jammu	32.69	74.84	2002-02-15	0	3.67	17.75
Jammu	32.69	74.84	2002-02-16	0	5.68	17.16
Jammu	32.69	74.84	2002-02-17	0	8.14	19.35
Jammu	32.69	74.84	2002-02-18	0	6.98	18.83
Jammu	32.69	74.84	2002-02-19	0	6.94	20.8
Jammu	32.69	74.84	2002-02-20	0	8.36	21.35
Jammu	32.69	74.84	2002-02-21	0	6.2	20.54
Jammu	32.69	74.84	2002-02-22	0.2951	8.94	20.25
Jammu	32.69	74.84	2002-02-23	3.3154	6.3	16.01
Jammu	32.69	74.84	2002-02-24	0.1983	6.11	16.03
Jammu	32.69	74.84	2002-02-25	0	4.93	17.8
Jammu	32.69	74.84	2002-02-26	0	4.54	16.5
Jammu	32.69	74.84	2002-02-27	0	5.3	17.44
Jammu	32.69	74.84	2002-02-28	0	5.54	19.7
Jammu	32.69	74.84	2002-03-01	0	7.9	18.31
Jammu	32.69	74.84	2002-03-02	10.6023	7.82	13.09
Jammu	32.69	74.84	2002-03-03	4.8158	4.36	13.01
Jammu	32.69	74.84	2002-03-04	0	4.81	18.15
Jammu	32.69	74.84	2002-03-05	0	5.78	20.08
Jammu	32.69	74.84	2002-03-06	0	6.55	21.4
Jammu	32.69	74.84	2002-03-07	0	6.46	23.07
Jammu	32.69	74.84	2002-03-08	0	9.23	21.26
Jammu	32.69	74.84	2002-03-09	2.9218	9.95	19.55
Jammu	32.69	74.84	2002-03-10	27.9402	7.34	15.94
Jammu	32.69	74.84	2002-03-11	0.2489	6.28	15.99
Jammu	32.69	74.84	2002-03-12	0	8.59	20.09
Jammu	32.69	74.84	2002-03-13	0	8.7	21.39
Jammu	32.69	74.84	2002-03-14	0	7.71	22.27
Jammu	32.69	74.84	2002-03-15	0	7.99	23.56
Jammu	32.69	74.84	2002-03-16	0	9.47	25.6
Jammu	32.69	74.84	2002-03-17	0	9.62	25.76
Jammu	32.69	74.84	2002-03-18	0	10.03	26.57
Jammu	32.69	74.84	2002-03-19	0	11.54	28.23
Jammu	32.69	74.84	2002-03-20	0	12.25	28.4
Jammu	32.69	74.84	2002-03-21	0	14.21	27.83
Jammu	32.69	74.84	2002-03-22	2.3793	11.69	23.98
Jammu	32.69	74.84	2002-03-23	0	13.2	25.36
Jammu	32.69	74.84	2002-03-24	0.3954	12.45	25.54
Jammu	32.69	74.84	2002-03-25	7.3917	10.12	23.55
Jammu	32.69	74.84	2002-03-26	0	9.75	21.72
Jammu	32.69	74.84	2002-03-27	0	10.55	25.28
Jammu	32.69	74.84	2002-03-28	0	10.13	26.78
Jammu	32.69	74.84	2002-03-29	0	10.31	27.19
Jammu	32.69	74.84	2002-03-30	0	11.35	28.28
Jammu	32.69	74.84	2002-03-31	0.3506	13.59	28.4
Jammu	32.69	74.84	2002-04-01	0	12.93	26.76
Jammu	32.69	74.84	2002-04-02	0	11.41	23.34
Jammu	32.69	74.84	2002-04-03	0	10.45	24.21
Jammu	32.69	74.84	2002-04-04	0	12.03	26.69
Jammu	32.69	74.84	2002-04-05	0	13.75	28.4
Jammu	32.69	74.84	2002-04-06	0	14.8	26.4
Jammu	32.69	74.84	2002-04-07	0.5084	13.99	23.55
Jammu	32.69	74.84	2002-04-08	1.0733	11.85	22.37
Jammu	32.69	74.84	2002-04-09	0	12.43	24.22
Jammu	32.69	74.84	2002-04-10	0	11.14	25.34
Jammu	32.69	74.84	2002-04-11	0	11.96	27.02
Jammu	32.69	74.84	2002-04-12	0	13.39	29.42
Jammu	32.69	74.84	2002-04-13	0	14.53	31.1
Jammu	32.69	74.84	2002-04-14	0	15.71	31.3
Jammu	32.69	74.84	2002-04-15	0	16.54	30.55
Jammu	32.69	74.84	2002-04-16	0	16.25	30.91
Jammu	32.69	74.84	2002-04-17	0	17.43	30.84
Jammu	32.69	74.84	2002-04-18	0	15.24	31.4
Jammu	32.69	74.84	2002-04-19	0	15.61	31.31
Jammu	32.69	74.84	2002-04-20	0	15.51	32.93
Jammu	32.69	74.84	2002-04-21	0	17.14	33.53
Jammu	32.69	74.84	2002-04-22	0	17.67	33.62
Jammu	32.69	74.84	2002-04-23	0	18.16	32.8
Jammu	32.69	74.84	2002-04-24	0.7147	18.01	29.54
Jammu	32.69	74.84	2002-04-25	19.4819	14.96	26.63
Jammu	32.69	74.84	2002-04-26	2.9781	11.45	22.08
Jammu	32.69	74.84	2002-04-27	0	14.17	26.44
Jammu	32.69	74.84	2002-04-28	0	16.74	28.06
Jammu	32.69	74.84	2002-04-29	0	13.23	25.95
Jammu	32.69	74.84	2002-04-30	0	14.14	28.52
Jammu	32.69	74.84	2002-05-01	0	16.67	28.79
Jammu	32.69	74.84	2002-05-02	0	16.3	30.54
Jammu	32.69	74.84	2002-05-03	0	15.22	29.75
Jammu	32.69	74.84	2002-05-04	0	16.72	32.7
Jammu	32.69	74.84	2002-05-05	0	18.08	33.98
Jammu	32.69	74.84	2002-05-06	0	19.66	35.43
Jammu	32.69	74.84	2002-05-07	0	18.51	33.17
Jammu	32.69	74.84	2002-05-08	0	18.53	33.18
Jammu	32.69	74.84	2002-05-09	0	19.8	35.28
Jammu	32.69	74.84	2002-05-10	0	19.99	36.5
Jammu	32.69	74.84	2002-05-11	0	19.94	36.34
Jammu	32.69	74.84	2002-05-12	0	18.53	37.12
Jammu	32.69	74.84	2002-05-13	0	20.5	37.19
Jammu	32.69	74.84	2002-05-14	0	20.82	35.56
Jammu	32.69	74.84	2002-05-15	0.9208	19.49	35.71
Jammu	32.69	74.84	2002-05-16	0	21.16	33.38
Jammu	32.69	74.84	2002-05-17	0	20.16	35.41
Jammu	32.69	74.84	2002-05-18	0	19.37	37.12
Jammu	32.69	74.84	2002-05-19	0	18.88	37.1
Jammu	32.69	74.84	2002-05-20	0	16.44	35.15
Jammu	32.69	74.84	2002-05-21	0	17.25	33.75
Jammu	32.69	74.84	2002-05-22	0	17.27	34.77
Jammu	32.69	74.84	2002-05-23	0	20.21	37.13
Jammu	32.69	74.84	2002-05-24	0	20.8	37.13
Jammu	32.69	74.84	2002-05-25	0	20.1	37.58
Jammu	32.69	74.84	2002-05-26	0	17.14	35.98
Jammu	32.69	74.84	2002-05-27	0	19.62	34.02
Jammu	32.69	74.84	2002-05-28	0	18.02	34.66
Jammu	32.69	74.84	2002-05-29	7.5386	16.15	30.28
Jammu	32.69	74.84	2002-05-30	0	16.82	27.04
Jammu	32.69	74.84	2002-05-31	0	18.99	30.84
Jammu	32.69	74.84	2002-06-01	0	19.58	32.32
Jammu	32.69	74.84	2002-06-02	0	19.64	32.04
Jammu	32.69	74.84	2002-06-03	0	18.63	33.26
Jammu	32.69	74.84	2002-06-04	0	19.49	32.45
Jammu	32.69	74.84	2002-06-05	0	20.28	34.91
Jammu	32.69	74.84	2002-06-06	1.0407	18.89	34.52
Jammu	32.69	74.84	2002-06-07	0	21.74	35.47
Jammu	32.69	74.84	2002-06-08	0	21.86	37.18
Jammu	32.69	74.84	2002-06-09	0	23.42	38.55
Jammu	32.69	74.84	2002-06-10	0.2208	21.74	37.51
Jammu	32.69	74.84	2002-06-11	0	22.92	35.59
Jammu	32.69	74.84	2002-06-12	4.7199	19.08	36.46
Jammu	32.69	74.84	2002-06-13	0	20.83	35.01
Jammu	32.69	74.84	2002-06-14	2.9648	21.39	35.99
Jammu	32.69	74.84	2002-06-15	0	21.4	34.61
Jammu	32.69	74.84	2002-06-16	4.557	20.38	35.69
Jammu	32.69	74.84	2002-06-17	22.5214	19.94	32.29
Jammu	32.69	74.84	2002-06-18	1.4742	19.53	29.87
Jammu	32.69	74.84	2002-06-19	0.1092	20.22	32.15
Jammu	32.69	74.84	2002-06-20	0	20.05	31.11
Jammu	32.69	74.84	2002-06-21	0	20.91	34.62
Jammu	32.69	74.84	2002-06-22	0	22.04	35.74
Jammu	32.69	74.84	2002-06-23	0	24.19	37.3
Jammu	32.69	74.84	2002-06-24	17.9328	22.09	36.51
Jammu	32.69	74.84	2002-06-25	0	21.62	33.16
Jammu	32.69	74.84	2002-06-26	2.1685	22.65	32.89
Jammu	32.69	74.84	2002-06-27	0.2183	21.06	32.64
Jammu	32.69	74.84	2002-06-28	43.4902	22.23	33.85
Jammu	32.69	74.84	2002-06-29	3.451	22.23	33.65
Jammu	32.69	74.84	2002-06-30	0	23.11	33.96
Jammu	32.69	74.84	2002-07-01	0	23.11	35.19
Jammu	32.69	74.84	2002-07-02	0	24.41	35.74
Jammu	32.69	74.84	2002-07-03	0	24.11	35.89
Jammu	32.69	74.84	2002-07-04	14.7424	22.87	35.68
Jammu	32.69	74.84	2002-07-05	42.5988	20.43	33.58
Jammu	32.69	74.84	2002-07-06	5.8001	20.97	32.09
Jammu	32.69	74.84	2002-07-07	0	20.97	31.85
Jammu	32.69	74.84	2002-07-08	0	21.78	34.18
Jammu	32.69	74.84	2002-07-09	0	22.7	34.06
Jammu	32.69	74.84	2002-07-10	37.1721	20.69	34.28
Jammu	32.69	74.84	2002-07-11	0	21.99	33.37
Jammu	32.69	74.84	2002-07-12	0	21.96	34.76
Jammu	32.69	74.84	2002-07-13	0.1735	22.86	35.24
Jammu	32.69	74.84	2002-07-14	0	22.47	35.15
Jammu	32.69	74.84	2002-07-15	0	22.18	34.81
Jammu	32.69	74.84	2002-07-16	0	23.44	34.45
Jammu	32.69	74.84	2002-07-17	0	23.82	34.39
Jammu	32.69	74.84	2002-07-18	0	23.83	35.3
Jammu	32.69	74.84	2002-07-19	0	23.35	34.66
Jammu	32.69	74.84	2002-07-20	0	24.01	34.73
Jammu	32.69	74.84	2002-07-21	29.4466	22.37	34.93
Jammu	32.69	74.84	2002-07-22	0	21.93	31.16
Jammu	32.69	74.84	2002-07-23	20.5036	19.78	32.36
Jammu	32.69	74.84	2002-07-24	0	21.35	31.16
Jammu	32.69	74.84	2002-07-25	3.6643	20.98	33.25
Jammu	32.69	74.84	2002-07-26	0	21.28	31.41
Jammu	32.69	74.84	2002-07-27	7.3712	21.68	32.79
Jammu	32.69	74.84	2002-07-28	0	22.57	33.3
Jammu	32.69	74.84	2002-07-29	0	21.52	33.31
Jammu	32.69	74.84	2002-07-30	7.6063	20.43	33.71
Jammu	32.69	74.84	2002-07-31	0	20.61	31.77
Jammu	32.69	74.84	2002-08-01	0	21.07	32.61
Jammu	32.69	74.84	2002-08-02	0	21.5	33.81
Jammu	32.69	74.84	2002-08-03	0	22.77	34.1
Jammu	32.69	74.84	2002-08-04	90.0406	22.89	33.6
Jammu	32.69	74.84	2002-08-05	0	22.92	30.83
Jammu	32.69	74.84	2002-08-06	0	23.24	33.12
Jammu	32.69	74.84	2002-08-07	0.492	22.97	32.46
Jammu	32.69	74.84	2002-08-08	0	23.4	32.95
Jammu	32.69	74.84	2002-08-09	1.0931	23.26	32.14
Jammu	32.69	74.84	2002-08-10	0	23.93	33.31
Jammu	32.69	74.84	2002-08-11	11.7833	23.93	34.52
Jammu	32.69	74.84	2002-08-12	15.8201	22.94	30.18
Jammu	32.69	74.84	2002-08-13	96.3941	20.99	28.74
Jammu	32.69	74.84	2002-08-14	35.308	20.48	25.21
Jammu	32.69	74.84	2002-08-15	0	20.15	26.91
Jammu	32.69	74.84	2002-08-16	0	20.35	29.57
Jammu	32.69	74.84	2002-08-17	0	21.16	31.78
Jammu	32.69	74.84	2002-08-18	0	22.45	32.69
Jammu	32.69	74.84	2002-08-19	0	21.52	32.79
Jammu	32.69	74.84	2002-08-20	0	22.02	32.83
Jammu	32.69	74.84	2002-08-21	0	22.38	33.27
Jammu	32.69	74.84	2002-08-22	1.2685	22.43	31.61
Jammu	32.69	74.84	2002-08-23	48.8465	21.67	30.61
Jammu	32.69	74.84	2002-08-24	86.5484	21.94	31.46
Jammu	32.69	74.84	2002-08-25	0.6381	22.51	29.04
Jammu	32.69	74.84	2002-08-26	0	22.32	30.91
Jammu	32.69	74.84	2002-08-27	4.5395	21.88	30.22
Jammu	32.69	74.84	2002-08-28	0	23.48	31.34
Jammu	32.69	74.84	2002-08-29	0.7863	22.63	31.15
Jammu	32.69	74.84	2002-08-30	43.855	21.21	30.36
Jammu	32.69	74.84	2002-08-31	7.6964	21.11	29.21
Jammu	32.69	74.84	2002-09-01	0	21.44	30.91
Jammu	32.69	74.84	2002-09-02	0	20.32	30.25
Jammu	32.69	74.84	2002-09-03	14.9611	19.66	28.05
Jammu	32.69	74.84	2002-09-04	0	19.08	29.64
Jammu	32.69	74.84	2002-09-05	24.022	18.24	30.11
Jammu	32.69	74.84	2002-09-06	0	17.11	29.38
Jammu	32.69	74.84	2002-09-07	0	17.73	30.45
Jammu	32.69	74.84	2002-09-08	0	17.69	28.34
Jammu	32.69	74.84	2002-09-09	0	16.8	27.97
Jammu	32.69	74.84	2002-09-10	0	17.31	30.09
Jammu	32.69	74.84	2002-09-11	0.5897	17.18	30.32
Jammu	32.69	74.84	2002-09-12	0	17.6	30.15
Jammu	32.69	74.84	2002-09-13	28.5234	18.1	27.13
Jammu	32.69	74.84	2002-09-14	65.4238	17.63	22.95
Jammu	32.69	74.84	2002-09-15	6.706	18.61	25.2
Jammu	32.69	74.84	2002-09-16	0	18.57	28.53
Jammu	32.69	74.84	2002-09-17	28.141	17.87	29.66
Jammu	32.69	74.84	2002-09-18	0	16.98	25.67
Jammu	32.69	74.84	2002-09-19	0	16.43	28.6
Jammu	32.69	74.84	2002-09-20	0	15.92	28.67
Jammu	32.69	74.84	2002-09-21	0	16	29.47
Jammu	32.69	74.84	2002-09-22	0	16.44	30.76
Jammu	32.69	74.84	2002-09-23	0	16.86	30.47
Jammu	32.69	74.84	2002-09-24	0.7863	17	29.85
Jammu	32.69	74.84	2002-09-25	0.1964	16.2	30.22
Jammu	32.69	74.84	2002-09-26	0	14.55	27.98
Jammu	32.69	74.84	2002-09-27	0	14.92	29.03
Jammu	32.69	74.84	2002-09-28	0	15.03	28.95
Jammu	32.69	74.84	2002-09-29	0	14.16	28.74
Jammu	32.69	74.84	2002-09-30	0	14.27	29.35
Jammu	32.69	74.84	2002-10-01	0	14.42	29.89
Jammu	32.69	74.84	2002-10-02	0	14.42	30.46
Jammu	32.69	74.84	2002-10-03	0	14.23	30.88
Jammu	32.69	74.84	2002-10-04	0	14.23	30.8
Jammu	32.69	74.84	2002-10-05	0	14.51	31.11
Jammu	32.69	74.84	2002-10-06	0	14.64	31.34
Jammu	32.69	74.84	2002-10-07	0	14.37	30.67
Jammu	32.69	74.84	2002-10-08	0	14.73	29.83
Jammu	32.69	74.84	2002-10-09	0	15.65	29.4
Jammu	32.69	74.84	2002-10-10	0	15.88	29.5
Jammu	32.69	74.84	2002-10-11	0	15.24	28.18
Jammu	32.69	74.84	2002-10-12	0	15.78	28.54
Jammu	32.69	74.84	2002-10-13	45.8019	14.42	25.96
Jammu	32.69	74.84	2002-10-14	8.2024	13.25	25.84
Jammu	32.69	74.84	2002-10-15	0	13	26.45
Jammu	32.69	74.84	2002-10-16	0	13.11	27.94
Jammu	32.69	74.84	2002-10-17	0	13.45	28.08
Jammu	32.69	74.84	2002-10-18	0	12.61	27.73
Jammu	32.69	74.84	2002-10-19	0	13.01	26.65
Jammu	32.69	74.84	2002-10-20	0	13.28	26.69
Jammu	32.69	74.84	2002-10-21	0	14.01	26.89
Jammu	32.69	74.84	2002-10-22	0.3444	11.78	25.21
Jammu	32.69	74.84	2002-10-23	1.0058	10.15	23.24
Jammu	32.69	74.84	2002-10-24	0	10.48	25.61
Jammu	32.69	74.84	2002-10-25	0	10.18	26.2
Jammu	32.69	74.84	2002-10-26	0	10.41	26.8
Jammu	32.69	74.84	2002-10-27	0	10.4	25.57
Jammu	32.69	74.84	2002-10-28	0	9.95	26.73
Jammu	32.69	74.84	2002-10-29	0	10.24	26.75
Jammu	32.69	74.84	2002-10-30	0	10.08	26.34
Jammu	32.69	74.84	2002-10-31	0	10.18	25.91
Jammu	32.69	74.84	2002-11-01	0	10.99	25.38
Jammu	32.69	74.84	2002-11-02	0	9.97	25.76
Jammu	32.69	74.84	2002-11-03	0	10.01	25.98
Jammu	32.69	74.84	2002-11-04	0	10.25	24.68
Jammu	32.69	74.84	2002-11-05	0	9.49	24.9
Jammu	32.69	74.84	2002-11-06	0	10.07	24.45
Jammu	32.69	74.84	2002-11-07	0	10.63	22.78
Jammu	32.69	74.84	2002-11-08	0	10	23.31
Jammu	32.69	74.84	2002-11-09	0	9.79	23.71
Jammu	32.69	74.84	2002-11-10	0	10.55	23.52
Jammu	32.69	74.84	2002-11-11	0	9.56	23.59
Jammu	32.69	74.84	2002-11-12	0	9.46	21.48
Jammu	32.69	74.84	2002-11-13	0	8.41	19.74
Jammu	32.69	74.84	2002-11-14	0	7.69	21.06
Jammu	32.69	74.84	2002-11-15	0	7.95	21.84
Jammu	32.69	74.84	2002-11-16	0	7.78	22.86
Jammu	32.69	74.84	2002-11-17	0	8.31	23.33
Jammu	32.69	74.84	2002-11-18	0	7.08	23.45
Jammu	32.69	74.84	2002-11-19	0	7.36	23.32
Jammu	32.69	74.84	2002-11-20	0	6.95	22.62
Jammu	32.69	74.84	2002-11-21	0	5.4	21.99
Jammu	32.69	74.84	2002-11-22	0	5.79	23.14
Jammu	32.69	74.84	2002-11-23	0	6.41	22.94
Jammu	32.69	74.84	2002-11-24	0	7.52	22.83
Jammu	32.69	74.84	2002-11-25	0	5.84	22.18
Jammu	32.69	74.84	2002-11-26	0	5.26	23.16
Jammu	32.69	74.84	2002-11-27	0	4.96	23.16
Jammu	32.69	74.84	2002-11-28	0	4.72	22.54
Jammu	32.69	74.84	2002-11-29	0	3.93	21.09
Jammu	32.69	74.84	2002-11-30	0	3.63	21.42
Jammu	32.69	74.84	2002-12-01	0	3.68	21.96
Jammu	32.69	74.84	2002-12-02	0	4.42	20.82
Jammu	32.69	74.84	2002-12-03	0	3.41	19.37
Jammu	32.69	74.84	2002-12-04	0	4.97	19.79
Jammu	32.69	74.84	2002-12-05	0	4.59	18.76
Jammu	32.69	74.84	2002-12-06	0	4.71	16.54
Jammu	32.69	74.84	2002-12-07	0	3.87	16.96
Jammu	32.69	74.84	2002-12-08	0	2.62	17.73
Jammu	32.69	74.84	2002-12-09	0	2.74	18.59
Jammu	32.69	74.84	2002-12-10	0	4.2	18.29
Jammu	32.69	74.84	2002-12-11	0	5.12	18.43
Jammu	32.69	74.84	2002-12-12	0	4.79	17.67
Jammu	32.69	74.84	2002-12-13	0	4.77	19.43
Jammu	32.69	74.84	2002-12-14	0	5.79	19.13
Jammu	32.69	74.84	2002-12-15	0	5.78	18.42
Jammu	32.69	74.84	2002-12-16	0	7.45	20.54
Jammu	32.69	74.84	2002-12-17	0	4.94	18.79
Jammu	32.69	74.84	2002-12-18	0	4.36	19.45
Jammu	32.69	74.84	2002-12-19	0	6.75	19.43
Jammu	32.69	74.84	2002-12-20	0.3855	5.42	15.09
Jammu	32.69	74.84	2002-12-21	0	3.84	16.14
Jammu	32.69	74.84	2002-12-22	0	4.06	17.23
Jammu	32.69	74.84	2002-12-23	0	3.57	17.09
Jammu	32.69	74.84	2002-12-24	0	5.05	15.29
Jammu	32.69	74.84	2002-12-25	7.9644	4.8	12.74
Jammu	32.69	74.84	2002-12-26	0	4.32	15
Jammu	32.69	74.84	2002-12-27	0	3.06	14.76
Jammu	32.69	74.84	2002-12-28	0	1.93	16.12
Jammu	32.69	74.84	2002-12-29	0	1.42	16.15
Jammu	32.69	74.84	2002-12-30	0	1	16.67
Jammu	32.69	74.84	2002-12-31	0	3.18	13.42
Jammu	32.69	74.84	2003-01-01	0	1.74	12.09
Jammu	32.69	74.84	2003-01-02	0	1.36	14.44
Jammu	32.69	74.84	2003-01-03	0	2.51	13.84
Jammu	32.69	74.84	2003-01-04	0	1.75	14.08
Jammu	32.69	74.84	2003-01-05	0	1.68	12.37
Jammu	32.69	74.84	2003-01-06	0	1.6	15.2
Jammu	32.69	74.84	2003-01-07	0	0.73	14.49
Jammu	32.69	74.84	2003-01-08	0	0.04	12.74
Jammu	32.69	74.84	2003-01-09	0	0.1	13.37
Jammu	32.69	74.84	2003-01-10	0	-0.13	13.16
Jammu	32.69	74.84	2003-01-11	0	1.08	13.16
Jammu	32.69	74.84	2003-01-12	0	1.96	13.76
Jammu	32.69	74.84	2003-01-13	0	0.63	13.75
Jammu	32.69	74.84	2003-01-14	0	0.76	14.04
Jammu	32.69	74.84	2003-01-15	0	1.43	14
Jammu	32.69	74.84	2003-01-16	0	2.67	16.09
Jammu	32.69	74.84	2003-01-17	0	3.43	15.82
Jammu	32.69	74.84	2003-01-18	0	3.31	15.51
Jammu	32.69	74.84	2003-01-19	0	2.05	14.65
Jammu	32.69	74.84	2003-01-20	0	1.45	16.53
Jammu	32.69	74.84	2003-01-21	0	2.11	14.37
Jammu	32.69	74.84	2003-01-22	0	2.31	15.3
Jammu	32.69	74.84	2003-01-23	0	2.51	16.94
Jammu	32.69	74.84	2003-01-24	0	1.68	16.9
Jammu	32.69	74.84	2003-01-25	0	3.86	17.63
Jammu	32.69	74.84	2003-01-26	0	3.5	17.32
Jammu	32.69	74.84	2003-01-27	0	5.65	17.66
Jammu	32.69	74.84	2003-01-28	2.5228	5.13	15.17
Jammu	32.69	74.84	2003-01-29	0	4.75	12.54
Jammu	32.69	74.84	2003-01-30	1.4958	5.82	13.98
Jammu	32.69	74.84	2003-01-31	9.1792	4.39	10.44
Jammu	32.69	74.84	2003-02-01	0	2.88	10.72
Jammu	32.69	74.84	2003-02-02	0	3.41	12.25
Jammu	32.69	74.84	2003-02-03	0	3.29	12.95
Jammu	32.69	74.84	2003-02-04	0	2.57	16.29
Jammu	32.69	74.84	2003-02-05	0	3.45	17.44
Jammu	32.69	74.84	2003-02-06	0	4.53	18.14
Jammu	32.69	74.84	2003-02-07	0	4.73	16.03
Jammu	32.69	74.84	2003-02-08	0	3.47	17.06
Jammu	32.69	74.84	2003-02-09	0	2.67	16.22
Jammu	32.69	74.84	2003-02-10	0	2.35	17.55
Jammu	32.69	74.84	2003-02-11	0	2.35	18.44
Jammu	32.69	74.84	2003-02-12	0	2.68	17.97
Jammu	32.69	74.84	2003-02-13	0	2.65	16.95
Jammu	32.69	74.84	2003-02-14	0	2.75	17.34
Jammu	32.69	74.84	2003-02-15	0	6.14	18.99
Jammu	32.69	74.84	2003-02-16	0.9103	7.06	19.83
Jammu	32.69	74.84	2003-02-17	6.6309	6.58	13.43
Jammu	32.69	74.84	2003-02-18	35.5099	7.02	11.89
Jammu	32.69	74.84	2003-02-19	114.665	4.98	12.69
Jammu	32.69	74.84	2003-02-20	20.6041	3.93	10.17
Jammu	32.69	74.84	2003-02-21	0	3.5	14.37
Jammu	32.69	74.84	2003-02-22	0	4.71	15.77
Jammu	32.69	74.84	2003-02-23	1.3415	6.47	17.9
Jammu	32.69	74.84	2003-02-24	0.398	6.69	13.62
Jammu	32.69	74.84	2003-02-25	0	6.67	18.48
Jammu	32.69	74.84	2003-02-26	0	7.93	20.55
Jammu	32.69	74.84	2003-02-27	0.5562	9.06	18.54
Jammu	32.69	74.84	2003-02-28	1.3804	8.43	17.89
Jammu	32.69	74.84	2003-03-01	13.2326	6.87	17.93
Jammu	32.69	74.84	2003-03-02	13.3395	6.83	13.46
Jammu	32.69	74.84	2003-03-03	34.1489	6.73	15.04
Jammu	32.69	74.84	2003-03-04	0	3.02	12.85
Jammu	32.69	74.84	2003-03-05	0	2.87	13.39
Jammu	32.69	74.84	2003-03-06	0	3.11	15.99
Jammu	32.69	74.84	2003-03-07	0	4.07	17.81
Jammu	32.69	74.84	2003-03-08	0	3.96	18.31
Jammu	32.69	74.84	2003-03-09	0	7.31	19.29
Jammu	32.69	74.84	2003-03-10	0.1158	7.71	16.59
Jammu	32.69	74.84	2003-03-11	1.3348	6.46	14.45
Jammu	32.69	74.84	2003-03-12	0	7.41	19.51
Jammu	32.69	74.84	2003-03-13	0	6.92	20.87
Jammu	32.69	74.84	2003-03-14	0	8.35	20.99
Jammu	32.69	74.84	2003-03-15	0	10.31	19.6
Jammu	32.69	74.84	2003-03-16	0	9.57	23.29
Jammu	32.69	74.84	2003-03-17	3.5369	8.9	20.86
Jammu	32.69	74.84	2003-03-18	0	8.54	20.15
Jammu	32.69	74.84	2003-03-19	0	8.92	22.19
Jammu	32.69	74.84	2003-03-20	0	8.62	23.54
Jammu	32.69	74.84	2003-03-21	0	9.81	24.38
Jammu	32.69	74.84	2003-03-22	0	10.78	25.88
Jammu	32.69	74.84	2003-03-23	0	11.41	25.42
Jammu	32.69	74.84	2003-03-24	0	11.96	24.57
Jammu	32.69	74.84	2003-03-25	0	13.05	24.9
Jammu	32.69	74.84	2003-03-26	0	11.48	24.01
Jammu	32.69	74.84	2003-03-27	0	12.38	24.89
Jammu	32.69	74.84	2003-03-28	0	13.4	27
Jammu	32.69	74.84	2003-03-29	8.4461	11.77	22.93
Jammu	32.69	74.84	2003-03-30	0.3029	10.36	19.15
Jammu	32.69	74.84	2003-03-31	0.7991	9.08	19.04
Jammu	32.69	74.84	2003-04-01	0	11.3	24.45
Jammu	32.69	74.84	2003-04-02	0	11.11	26.46
Jammu	32.69	74.84	2003-04-03	0.4172	11.33	23.83
Jammu	32.69	74.84	2003-04-04	1.8351	10.9	23.02
Jammu	32.69	74.84	2003-04-05	0	9.22	21.7
Jammu	32.69	74.84	2003-04-06	0	10.77	24.51
Jammu	32.69	74.84	2003-04-07	0	11.63	26.85
Jammu	32.69	74.84	2003-04-08	0	12.28	28.56
Jammu	32.69	74.84	2003-04-09	0	13.08	29.82
Jammu	32.69	74.84	2003-04-10	0	14.35	31.02
Jammu	32.69	74.84	2003-04-11	0	14.56	31.21
Jammu	32.69	74.84	2003-04-12	0	15.18	30.75
Jammu	32.69	74.84	2003-04-13	0	15.63	31.42
Jammu	32.69	74.84	2003-04-14	0.2861	16.73	31.67
Jammu	32.69	74.84	2003-04-15	0	16.16	28.29
Jammu	32.69	74.84	2003-04-16	0.2119	14.61	26.08
Jammu	32.69	74.84	2003-04-17	0	14.32	26.23
Jammu	32.69	74.84	2003-04-18	0	13.9	29.47
Jammu	32.69	74.84	2003-04-19	0.6184	14.83	28.74
Jammu	32.69	74.84	2003-04-20	4.5622	11.06	22.59
Jammu	32.69	74.84	2003-04-21	0	12.37	24
Jammu	32.69	74.84	2003-04-22	0	13.8	28.3
Jammu	32.69	74.84	2003-04-23	0	15.41	29.89
Jammu	32.69	74.84	2003-04-24	0	16.96	33.18
Jammu	32.69	74.84	2003-04-25	0	18.6	33.58
Jammu	32.69	74.84	2003-04-26	0	17.44	32.95
Jammu	32.69	74.84	2003-04-27	0	14.11	24.84
Jammu	32.69	74.84	2003-04-28	4.1515	13.86	25.12
Jammu	32.69	74.84	2003-04-29	0	15.83	27.54
Jammu	32.69	74.84	2003-04-30	0	16.53	31.62
Jammu	32.69	74.84	2003-05-01	0	17.4	32.39
Jammu	32.69	74.84	2003-05-02	0.1439	17.6	28.09
Jammu	32.69	74.84	2003-05-03	0.4296	15.55	27.42
Jammu	32.69	74.84	2003-05-04	0	11.88	24.62
Jammu	32.69	74.84	2003-05-05	0	12.25	25.33
Jammu	32.69	74.84	2003-05-06	0	12.86	27.57
Jammu	32.69	74.84	2003-05-07	0	12.99	28.86
Jammu	32.69	74.84	2003-05-08	0	13.84	30.6
Jammu	32.69	74.84	2003-05-09	0	14.44	32.29
Jammu	32.69	74.84	2003-05-10	0	15.36	32.78
Jammu	32.69	74.84	2003-05-11	0	16.27	31.45
Jammu	32.69	74.84	2003-05-12	0	16.64	32.25
Jammu	32.69	74.84	2003-05-13	1.7245	16.78	30.85
Jammu	32.69	74.84	2003-05-14	0	15.3	29.86
Jammu	32.69	74.84	2003-05-15	0	16.31	31.94
Jammu	32.69	74.84	2003-05-16	0	15.18	31.95
Jammu	32.69	74.84	2003-05-17	0	16.19	33.46
Jammu	32.69	74.84	2003-05-18	0	16.75	35.04
Jammu	32.69	74.84	2003-05-19	0	18.97	35.53
Jammu	32.69	74.84	2003-05-20	0	18.15	35.66
Jammu	32.69	74.84	2003-05-21	0	19.81	35.07
Jammu	32.69	74.84	2003-05-22	0	18.54	34
Jammu	32.69	74.84	2003-05-23	0.7982	16.13	31.55
Jammu	32.69	74.84	2003-05-24	0.6955	16.63	29.01
Jammu	32.69	74.84	2003-05-25	0	17.16	29
Jammu	32.69	74.84	2003-05-26	4.9482	17.2	30.41
Jammu	32.69	74.84	2003-05-27	0	16.66	30.92
Jammu	32.69	74.84	2003-05-28	0	18.13	32.82
Jammu	32.69	74.84	2003-05-29	0	16.72	31.37
Jammu	32.69	74.84	2003-05-30	0	17.88	34.09
Jammu	32.69	74.84	2003-05-31	0	19.2	36.05
Jammu	32.69	74.84	2003-06-01	0	20.04	37.34
Jammu	32.69	74.84	2003-06-02	0	19.53	36.76
Jammu	32.69	74.84	2003-06-03	0	20.9	37.67
Jammu	32.69	74.84	2003-06-04	0	21.93	37.53
Jammu	32.69	74.84	2003-06-05	0	20.23	37.62
Jammu	32.69	74.84	2003-06-06	0	21.32	38.39
Jammu	32.69	74.84	2003-06-07	0	21.32	38.84
Jammu	32.69	74.84	2003-06-08	0	21.81	39.45
Jammu	32.69	74.84	2003-06-09	0	21.48	37.43
Jammu	32.69	74.84	2003-06-10	24.4187	21.21	33.57
Jammu	32.69	74.84	2003-06-11	0	20.12	33.94
Jammu	32.69	74.84	2003-06-12	0	20.89	34.97
Jammu	32.69	74.84	2003-06-13	0	20.59	34.68
Jammu	32.69	74.84	2003-06-14	0	19.68	36.1
Jammu	32.69	74.84	2003-06-15	0	20.55	37.24
Jammu	32.69	74.84	2003-06-16	0	19.96	37.06
Jammu	32.69	74.84	2003-06-17	0	20.78	36.99
Jammu	32.69	74.84	2003-06-18	5.3772	20.96	37.32
Jammu	32.69	74.84	2003-06-19	0	21.54	33.58
Jammu	32.69	74.84	2003-06-20	17.0639	20.71	32.89
Jammu	32.69	74.84	2003-06-21	19.1478	20.4	34.37
Jammu	32.69	74.84	2003-06-22	0.2958	20.5	32.43
Jammu	32.69	74.84	2003-06-23	0	20.9	34.36
Jammu	32.69	74.84	2003-06-24	0	21.07	32.47
Jammu	32.69	74.84	2003-06-25	16.9081	21.01	34.72
Jammu	32.69	74.84	2003-06-26	0	22.67	33.8
Jammu	32.69	74.84	2003-06-27	7.5574	22.33	34.72
Jammu	32.69	74.84	2003-06-28	15.5673	21.16	32.11
Jammu	32.69	74.84	2003-06-29	0	22.03	33.8
Jammu	32.69	74.84	2003-06-30	0.1966	20.06	32.68
Jammu	32.69	74.84	2003-07-01	0	21.02	32.34
Jammu	32.69	74.84	2003-07-02	0	21.12	33.79
Jammu	32.69	74.84	2003-07-03	0	22.2	34.78
Jammu	32.69	74.84	2003-07-04	58.6748	23.06	35.5
Jammu	32.69	74.84	2003-07-05	37.4703	22.3	33.96
Jammu	32.69	74.84	2003-07-06	1.2024	20.78	29.86
Jammu	32.69	74.84	2003-07-07	2.5435	21.32	31.58
Jammu	32.69	74.84	2003-07-08	0	21.41	30.68
Jammu	32.69	74.84	2003-07-09	5.3273	20.07	32.57
Jammu	32.69	74.84	2003-07-10	5.4372	19.56	29.81
Jammu	32.69	74.84	2003-07-11	2.0639	20.92	30.37
Jammu	32.69	74.84	2003-07-12	0	21.57	31.4
Jammu	32.69	74.84	2003-07-13	34.1962	20.95	31.14
Jammu	32.69	74.84	2003-07-14	4.521	21.3	31.46
Jammu	32.69	74.84	2003-07-15	1.1794	22.69	33.01
Jammu	32.69	74.84	2003-07-16	0.4028	22.72	32.64
Jammu	32.69	74.84	2003-07-17	0.1421	21.59	31.67
Jammu	32.69	74.84	2003-07-18	0.2948	21.67	30.1
Jammu	32.69	74.84	2003-07-19	7.9609	22.21	31.84
Jammu	32.69	74.84	2003-07-20	92.7788	23.68	33.14
Jammu	32.69	74.84	2003-07-21	32.9286	22.66	32.84
Jammu	32.69	74.84	2003-07-22	2.5148	21.8	29.44
Jammu	32.69	74.84	2003-07-23	0	23.34	32.36
Jammu	32.69	74.84	2003-07-24	8.759	23.48	32.87
Jammu	32.69	74.84	2003-07-25	0.2758	22.45	31.86
Jammu	32.69	74.84	2003-07-26	0	23.35	33.48
Jammu	32.69	74.84	2003-07-27	0.1966	22.77	32.59
Jammu	32.69	74.84	2003-07-28	0	22.46	32.65
Jammu	32.69	74.84	2003-07-29	100.941	21.74	31.91
Jammu	32.69	74.84	2003-07-30	49.4602	21.73	31.45
Jammu	32.69	74.84	2003-07-31	0	22.76	32.79
Jammu	32.69	74.84	2003-08-01	61.3068	22.53	31.94
Jammu	32.69	74.84	2003-08-02	0.2287	22.9	30.4
Jammu	32.69	74.84	2003-08-03	36.0387	22.38	30.93
Jammu	32.69	74.84	2003-08-04	97.1599	20.98	28.92
Jammu	32.69	74.84	2003-08-05	1.2987	21.37	26.99
Jammu	32.69	74.84	2003-08-06	0	21.14	30.51
Jammu	32.69	74.84	2003-08-07	0	22.01	31.53
Jammu	32.69	74.84	2003-08-08	2.9793	21.62	33.17
Jammu	32.69	74.84	2003-08-09	0.1852	22.31	33.19
Jammu	32.69	74.84	2003-08-10	0	20.53	31.87
Jammu	32.69	74.84	2003-08-11	0	20.63	31.28
Jammu	32.69	74.84	2003-08-12	0	20.55	31.99
Jammu	32.69	74.84	2003-08-13	0	21.06	32.05
Jammu	32.69	74.84	2003-08-14	0	21.43	32.9
Jammu	32.69	74.84	2003-08-15	0	20.87	31.69
Jammu	32.69	74.84	2003-08-16	0	21.87	31.3
Jammu	32.69	74.84	2003-08-17	0	21.85	32.17
Jammu	32.69	74.84	2003-08-18	0.4914	22.24	32.92
Jammu	32.69	74.84	2003-08-19	73.4801	21.6	31.13
Jammu	32.69	74.84	2003-08-20	102.195	19.86	27.56
Jammu	32.69	74.84	2003-08-21	27.7404	19.38	27.89
Jammu	32.69	74.84	2003-08-22	0	19.94	29.79
Jammu	32.69	74.84	2003-08-23	0	19.49	31.01
Jammu	32.69	74.84	2003-08-24	0	20.55	32.27
Jammu	32.69	74.84	2003-08-25	5.1107	20.45	32.13
Jammu	32.69	74.84	2003-08-26	0	22.04	31.7
Jammu	32.69	74.84	2003-08-27	1.375	21.61	32.52
Jammu	32.69	74.84	2003-08-28	2.5677	21.74	29.52
Jammu	32.69	74.84	2003-08-29	3.1869	21.27	30.81
Jammu	32.69	74.84	2003-08-30	12.8923	21.13	30.43
Jammu	32.69	74.84	2003-08-31	0	20.89	28.63
Jammu	32.69	74.84	2003-09-01	0	21.08	30.85
Jammu	32.69	74.84	2003-09-02	113.025	21.01	32.96
Jammu	32.69	74.84	2003-09-03	50.3207	22.09	32.26
Jammu	32.69	74.84	2003-09-04	0	20.79	30.49
Jammu	32.69	74.84	2003-09-05	9.3082	20.44	29.62
Jammu	32.69	74.84	2003-09-06	6.341	19.12	29.11
Jammu	32.69	74.84	2003-09-07	0	19.27	30.06
Jammu	32.69	74.84	2003-09-08	0	20.17	30.39
Jammu	32.69	74.84	2003-09-09	0	18.76	30
Jammu	32.69	74.84	2003-09-10	0	18.81	30.57
Jammu	32.69	74.84	2003-09-11	0	19.44	30.64
Jammu	32.69	74.84	2003-09-12	0	20.04	31.08
Jammu	32.69	74.84	2003-09-13	0	20.79	30.44
Jammu	32.69	74.84	2003-09-14	0	20.84	30.63
Jammu	32.69	74.84	2003-09-15	0	20.17	31.54
Jammu	32.69	74.84	2003-09-16	1.5894	18.99	31.55
Jammu	32.69	74.84	2003-09-17	0	19.2	31.09
Jammu	32.69	74.84	2003-09-18	0	19.65	32.07
Jammu	32.69	74.84	2003-09-19	0	19.58	32.19
Jammu	32.69	74.84	2003-09-20	0	20.31	32.7
Jammu	32.69	74.84	2003-09-21	0	20.57	32.46
Jammu	32.69	74.84	2003-09-22	0	21.38	33.27
Jammu	32.69	74.84	2003-09-23	2.9485	20.67	32.73
Jammu	32.69	74.84	2003-09-24	11.6643	18.56	30.27
Jammu	32.69	74.84	2003-09-25	45.1705	16.88	27.15
Jammu	32.69	74.84	2003-09-26	12.7022	15.7	23.51
Jammu	32.69	74.84	2003-09-27	0	15.84	27.72
Jammu	32.69	74.84	2003-09-28	0	15.39	27.41
Jammu	32.69	74.84	2003-09-29	0	14.49	27.07
Jammu	32.69	74.84	2003-09-30	0	13.65	26.87
Jammu	32.69	74.84	2003-10-01	0	13.44	27.65
Jammu	32.69	74.84	2003-10-02	0	12.98	28.23
Jammu	32.69	74.84	2003-10-03	0	13.39	28.9
Jammu	32.69	74.84	2003-10-04	0	13.35	29.02
Jammu	32.69	74.84	2003-10-05	0	13.6	29.99
Jammu	32.69	74.84	2003-10-06	0	14.21	30.37
Jammu	32.69	74.84	2003-10-07	0	15	30.31
Jammu	32.69	74.84	2003-10-08	0	14.73	29.25
Jammu	32.69	74.84	2003-10-09	0	14.78	27.75
Jammu	32.69	74.84	2003-10-10	0.679	12.31	25.61
Jammu	32.69	74.84	2003-10-11	0	12.38	27.36
Jammu	32.69	74.84	2003-10-12	0	12.58	27.59
Jammu	32.69	74.84	2003-10-13	0	11.73	27.6
Jammu	32.69	74.84	2003-10-14	0	11.69	28.27
Jammu	32.69	74.84	2003-10-15	0	11.45	28.51
Jammu	32.69	74.84	2003-10-16	0	11.35	28.96
Jammu	32.69	74.84	2003-10-17	0	11.11	28.41
Jammu	32.69	74.84	2003-10-18	0	10.77	28.51
Jammu	32.69	74.84	2003-10-19	0	11.24	28.69
Jammu	32.69	74.84	2003-10-20	0	10.83	27.87
Jammu	32.69	74.84	2003-10-21	0	10.81	27.43
Jammu	32.69	74.84	2003-10-22	0	10.46	28.33
Jammu	32.69	74.84	2003-10-23	0	10.09	28.09
Jammu	32.69	74.84	2003-10-24	0	10.61	28.14
Jammu	32.69	74.84	2003-10-25	0	10.57	27.68
Jammu	32.69	74.84	2003-10-26	0	11	26.77
Jammu	32.69	74.84	2003-10-27	0	10.33	26.9
Jammu	32.69	74.84	2003-10-28	0	11.03	27.27
Jammu	32.69	74.84	2003-10-29	0	10.65	27.77
Jammu	32.69	74.84	2003-10-30	0	10.44	28.17
Jammu	32.69	74.84	2003-10-31	0	10.42	27.47
Jammu	32.69	74.84	2003-11-01	0	10.91	26.57
Jammu	32.69	74.84	2003-11-02	0	10.67	26.31
Jammu	32.69	74.84	2003-11-03	0	10.04	26.51
Jammu	32.69	74.84	2003-11-04	0	9.88	26.99
Jammu	32.69	74.84	2003-11-05	0	9.64	26.5
Jammu	32.69	74.84	2003-11-06	0	9.41	25.04
Jammu	32.69	74.84	2003-11-07	0	7.89	24.41
Jammu	32.69	74.84	2003-11-08	0	8.64	24.14
Jammu	32.69	74.84	2003-11-09	0	7.66	21.95
Jammu	32.69	74.84	2003-11-10	0	7.34	22.04
Jammu	32.69	74.84	2003-11-11	0	6.65	22.5
Jammu	32.69	74.84	2003-11-12	0	6.38	23.28
Jammu	32.69	74.84	2003-11-13	0	7.06	22.23
Jammu	32.69	74.84	2003-11-14	0	8.53	21.24
Jammu	32.69	74.84	2003-11-15	0	7.13	18.81
Jammu	32.69	74.84	2003-11-16	0	9.24	20.28
Jammu	32.69	74.84	2003-11-17	21.0353	6.79	17.11
Jammu	32.69	74.84	2003-11-18	7.3459	6.45	15.41
Jammu	32.69	74.84	2003-11-19	0.1116	5.02	14.94
Jammu	32.69	74.84	2003-11-20	0	4.27	17.95
Jammu	32.69	74.84	2003-11-21	0	3.65	18.6
Jammu	32.69	74.84	2003-11-22	0	2.85	19.44
Jammu	32.69	74.84	2003-11-23	0	2.95	20.01
Jammu	32.69	74.84	2003-11-24	0	3.22	20.52
Jammu	32.69	74.84	2003-11-25	0	3.07	20.08
Jammu	32.69	74.84	2003-11-26	0	3.94	19.81
Jammu	32.69	74.84	2003-11-27	0	3.2	20.01
Jammu	32.69	74.84	2003-11-28	0	2.93	19.44
Jammu	32.69	74.84	2003-11-29	0	2.36	19.08
Jammu	32.69	74.84	2003-11-30	0	3.18	18.68
Jammu	32.69	74.84	2003-12-01	0	3.09	18.5
Jammu	32.69	74.84	2003-12-02	0	5.48	19.22
Jammu	32.69	74.84	2003-12-03	0	4.74	20.15
Jammu	32.69	74.84	2003-12-04	0	5.49	17.84
Jammu	32.69	74.84	2003-12-05	0	4.29	19.59
Jammu	32.69	74.84	2003-12-06	0	3.88	20.22
Jammu	32.69	74.84	2003-12-07	0	4.48	19.98
Jammu	32.69	74.84	2003-12-08	0	5.72	20.53
Jammu	32.69	74.84	2003-12-09	0	6.63	21.41
Jammu	32.69	74.84	2003-12-10	1.2435	7.17	18.33
Jammu	32.69	74.84	2003-12-11	0	5.84	18.12
Jammu	32.69	74.84	2003-12-12	0	5.23	18.72
Jammu	32.69	74.84	2003-12-13	1.3845	6.59	17.88
Jammu	32.69	74.84	2003-12-14	6.2583	6.11	14.85
Jammu	32.69	74.84	2003-12-15	2.5903	5.67	17.46
Jammu	32.69	74.84	2003-12-16	20.0875	3.67	11.09
Jammu	32.69	74.84	2003-12-17	0	2.9	13.95
Jammu	32.69	74.84	2003-12-18	0	3.25	15.73
Jammu	32.69	74.84	2003-12-19	0	1.97	14.14
Jammu	32.69	74.84	2003-12-20	0	1.66	15.43
Jammu	32.69	74.84	2003-12-21	0	1.5	15.45
Jammu	32.69	74.84	2003-12-22	0	0.95	16.12
Jammu	32.69	74.84	2003-12-23	0	3.02	15.25
Jammu	32.69	74.84	2003-12-24	0.4373	2.15	11.63
Jammu	32.69	74.84	2003-12-25	0	2.69	14.06
Jammu	32.69	74.84	2003-12-26	0	1.18	13.29
Jammu	32.69	74.84	2003-12-27	0	2.27	13.49
Jammu	32.69	74.84	2003-12-28	0	0.92	11.43
Jammu	32.69	74.84	2003-12-29	0	1.27	12.42
Jammu	32.69	74.84	2003-12-30	0	1.72	13.78
Jammu	32.69	74.84	2003-12-31	0	4.16	14.13
Jammu	32.69	74.84	2004-01-01	0.5733	4.27	12.74
Jammu	32.69	74.84	2004-01-02	0	2.87	11.32
Jammu	32.69	74.84	2004-01-03	0	2.12	11.8
Jammu	32.69	74.84	2004-01-04	0	1.03	12.17
Jammu	32.69	74.84	2004-01-05	0	1.98	12.07
Jammu	32.69	74.84	2004-01-06	1.0243	2.38	11.39
Jammu	32.69	74.84	2004-01-07	0	2.1	13.44
Jammu	32.69	74.84	2004-01-08	0	1.73	15.1
Jammu	32.69	74.84	2004-01-09	0	3.52	15.6
Jammu	32.69	74.84	2004-01-10	0	3.88	16.63
Jammu	32.69	74.84	2004-01-11	0	4.67	16.92
Jammu	32.69	74.84	2004-01-12	0	4.42	17.85
Jammu	32.69	74.84	2004-01-13	0	6.03	17.12
Jammu	32.69	74.84	2004-01-14	0	5.11	17.09
Jammu	32.69	74.84	2004-01-15	0	4.13	17.66
Jammu	32.69	74.84	2004-01-16	0	6.82	18.32
Jammu	32.69	74.84	2004-01-17	0.3169	7.38	18.91
Jammu	32.69	74.84	2004-01-18	16.7101	3.8	12.91
Jammu	32.69	74.84	2004-01-19	0	3.2	14.26
Jammu	32.69	74.84	2004-01-20	0	2.76	13.86
Jammu	32.69	74.84	2004-01-21	1.017	5.65	13.9
Jammu	32.69	74.84	2004-01-22	32.048	4.71	9.61
Jammu	32.69	74.84	2004-01-23	19.4736	3.75	11.48
Jammu	32.69	74.84	2004-01-24	12.6612	1.76	9.35
Jammu	32.69	74.84	2004-01-25	0	1.08	13.53
Jammu	32.69	74.84	2004-01-26	0	1.57	12.36
Jammu	32.69	74.84	2004-01-27	0	0.71	13.82
Jammu	32.69	74.84	2004-01-28	0	1.28	14.99
Jammu	32.69	74.84	2004-01-29	0.7439	3.87	12.55
Jammu	32.69	74.84	2004-01-30	4.0531	3.29	10.97
Jammu	32.69	74.84	2004-01-31	35.539	2.91	7.24
Jammu	32.69	74.84	2004-02-01	0.1904	1.12	9.08
Jammu	32.69	74.84	2004-02-02	0	1.57	12.14
Jammu	32.69	74.84	2004-02-03	0	0.93	12.88
Jammu	32.69	74.84	2004-02-04	0	0.69	13.83
Jammu	32.69	74.84	2004-02-05	0	0.66	15.91
Jammu	32.69	74.84	2004-02-06	0	0.79	15.82
Jammu	32.69	74.84	2004-02-07	0	1.28	15.81
Jammu	32.69	74.84	2004-02-08	0	3.44	17.42
Jammu	32.69	74.84	2004-02-09	1.0408	5.12	15.07
Jammu	32.69	74.84	2004-02-10	16.9426	4.71	12.37
Jammu	32.69	74.84	2004-02-11	0.5768	4.57	15.36
Jammu	32.69	74.84	2004-02-12	0	4.36	18.12
Jammu	32.69	74.84	2004-02-13	0	5.03	20.02
Jammu	32.69	74.84	2004-02-14	0	4.67	19.68
Jammu	32.69	74.84	2004-02-15	0	5.22	20.39
Jammu	32.69	74.84	2004-02-16	0	6.35	20.63
Jammu	32.69	74.84	2004-02-17	0	7.65	22.09
Jammu	32.69	74.84	2004-02-18	6.4451	8.46	21.74
Jammu	32.69	74.84	2004-02-19	4.3463	5.85	16.95
Jammu	32.69	74.84	2004-02-20	0	5.79	18.4
Jammu	32.69	74.84	2004-02-21	0	5.66	20.76
Jammu	32.69	74.84	2004-02-22	0	7.51	20.87
Jammu	32.69	74.84	2004-02-23	0	6.99	19.58
Jammu	32.69	74.84	2004-02-24	0	6.86	21.75
Jammu	32.69	74.84	2004-02-25	0	7.68	23.8
Jammu	32.69	74.84	2004-02-26	0	8.93	24.98
Jammu	32.69	74.84	2004-02-27	0.2064	10.28	24.33
Jammu	32.69	74.84	2004-02-28	2.8707	7.6	20.55
Jammu	32.69	74.84	2004-02-29	0	7.32	22.18
Jammu	32.69	74.84	2004-03-01	0	6.23	22.57
Jammu	32.69	74.84	2004-03-02	0	6.19	22.39
Jammu	32.69	74.84	2004-03-03	0	7.05	23.23
Jammu	32.69	74.84	2004-03-04	0	6.97	23.62
Jammu	32.69	74.84	2004-03-05	0	7.9	25
Jammu	32.69	74.84	2004-03-06	0	8.63	24.39
Jammu	32.69	74.84	2004-03-07	0	8.86	24.72
Jammu	32.69	74.84	2004-03-08	0	10.43	27.07
Jammu	32.69	74.84	2004-03-09	0	10.65	27.24
Jammu	32.69	74.84	2004-03-10	0	11.03	25.25
Jammu	32.69	74.84	2004-03-11	0	9.36	25.69
Jammu	32.69	74.84	2004-03-12	0	10.16	25.68
Jammu	32.69	74.84	2004-03-13	0	10.66	26.31
Jammu	32.69	74.84	2004-03-14	0	11.02	26.91
Jammu	32.69	74.84	2004-03-15	0	12.11	28
Jammu	32.69	74.84	2004-03-16	0	12.62	29.03
Jammu	32.69	74.84	2004-03-17	0	12.73	30.71
Jammu	32.69	74.84	2004-03-18	0	13.76	31.2
Jammu	32.69	74.84	2004-03-19	0	12.91	30.01
Jammu	32.69	74.84	2004-03-20	0	12.04	30.12
Jammu	32.69	74.84	2004-03-21	0	13.6	29.75
Jammu	32.69	74.84	2004-03-22	0	15.1	30.08
Jammu	32.69	74.84	2004-03-23	0	13.09	23.99
Jammu	32.69	74.84	2004-03-24	0	12.91	26.24
Jammu	32.69	74.84	2004-03-25	0	11.07	23.81
Jammu	32.69	74.84	2004-03-26	0	10.37	25.48
Jammu	32.69	74.84	2004-03-27	0	11.01	26.87
Jammu	32.69	74.84	2004-03-28	0	11.14	28.08
Jammu	32.69	74.84	2004-03-29	0	10.87	28.87
Jammu	32.69	74.84	2004-03-30	0	10.6	29.44
Jammu	32.69	74.84	2004-03-31	0	10.85	28.66
Jammu	32.69	74.84	2004-04-01	0	13.06	30.27
Jammu	32.69	74.84	2004-04-02	0	13.46	28.16
Jammu	32.69	74.84	2004-04-03	0	13.42	30.56
Jammu	32.69	74.84	2004-04-04	0	13.81	31.04
Jammu	32.69	74.84	2004-04-05	0	14.08	31.35
Jammu	32.69	74.84	2004-04-06	0	14.69	32.24
Jammu	32.69	74.84	2004-04-07	0	15.47	32.56
Jammu	32.69	74.84	2004-04-08	0	14.38	30.16
Jammu	32.69	74.84	2004-04-09	0	13.98	27.14
Jammu	32.69	74.84	2004-04-10	0.1237	13.45	26.58
Jammu	32.69	74.84	2004-04-11	0	13.8	28.6
Jammu	32.69	74.84	2004-04-12	0	14.63	30.57
Jammu	32.69	74.84	2004-04-13	0	15.25	30.68
Jammu	32.69	74.84	2004-04-14	0	14.57	30.62
Jammu	32.69	74.84	2004-04-15	0	14.45	31.88
Jammu	32.69	74.84	2004-04-16	0	15.13	32.58
Jammu	32.69	74.84	2004-04-17	0.1869	17.27	31.93
Jammu	32.69	74.84	2004-04-18	0	15.84	28.34
Jammu	32.69	74.84	2004-04-19	0	15.78	31.8
Jammu	32.69	74.84	2004-04-20	0	18.45	34.01
Jammu	32.69	74.84	2004-04-21	0	16.59	31.34
Jammu	32.69	74.84	2004-04-22	1.9823	14.5	26.64
Jammu	32.69	74.84	2004-04-23	2.0097	13.46	25.4
Jammu	32.69	74.84	2004-04-24	0	12.22	26.25
Jammu	32.69	74.84	2004-04-25	0	14.37	29.92
Jammu	32.69	74.84	2004-04-26	0	16.28	30.54
Jammu	32.69	74.84	2004-04-27	0	17.26	31.54
Jammu	32.69	74.84	2004-04-28	0.4636	14.92	29.5
Jammu	32.69	74.84	2004-04-29	0.8712	15.08	28.28
Jammu	32.69	74.84	2004-04-30	43.9687	11.2	23.49
Jammu	32.69	74.84	2004-05-01	27.9841	8.67	20.41
Jammu	32.69	74.84	2004-05-02	0.1747	10.33	20.62
Jammu	32.69	74.84	2004-05-03	0	11.43	24.04
Jammu	32.69	74.84	2004-05-04	0	12.63	28.74
Jammu	32.69	74.84	2004-05-05	0	13.88	29.74
Jammu	32.69	74.84	2004-05-06	0	15.17	32.04
Jammu	32.69	74.84	2004-05-07	0	16.87	34.27
Jammu	32.69	74.84	2004-05-08	0	17.92	34.49
Jammu	32.69	74.84	2004-05-09	0	18.16	31.24
Jammu	32.69	74.84	2004-05-10	0	17.23	32.69
Jammu	32.69	74.84	2004-05-11	0	17.81	34.31
Jammu	32.69	74.84	2004-05-12	0	19.08	35.33
Jammu	32.69	74.84	2004-05-13	0	18.56	34.69
Jammu	32.69	74.84	2004-05-14	0	18.92	35.93
Jammu	32.69	74.84	2004-05-15	0	20.31	37.02
Jammu	32.69	74.84	2004-05-16	0	21.57	37.26
Jammu	32.69	74.84	2004-05-17	0.4946	21.03	36.71
Jammu	32.69	74.84	2004-05-18	0	19.16	34.33
Jammu	32.69	74.84	2004-05-19	0	20.99	36.64
Jammu	32.69	74.84	2004-05-20	0	21.6	38.01
Jammu	32.69	74.84	2004-05-21	0	20.71	38.35
Jammu	32.69	74.84	2004-05-22	0	20.32	37.86
Jammu	32.69	74.84	2004-05-23	0	19.96	37.37
Jammu	32.69	74.84	2004-05-24	0.816	16.71	31.72
Jammu	32.69	74.84	2004-05-25	0	17.98	31.85
Jammu	32.69	74.84	2004-05-26	0	18.35	33.44
Jammu	32.69	74.84	2004-05-27	0	17.27	30.97
Jammu	32.69	74.84	2004-05-28	0	17.69	27.59
Jammu	32.69	74.84	2004-05-29	0	17.75	29.71
Jammu	32.69	74.84	2004-05-30	0	19.11	33.98
Jammu	32.69	74.84	2004-05-31	0	20.62	35.91
Jammu	32.69	74.84	2004-06-01	0.2771	18.59	34.28
Jammu	32.69	74.84	2004-06-02	0.49	18.07	33.13
Jammu	32.69	74.84	2004-06-03	0	18.39	31.44
Jammu	32.69	74.84	2004-06-04	0.3264	19.11	34.8
Jammu	32.69	74.84	2004-06-05	0	19.65	35.89
Jammu	32.69	74.84	2004-06-06	0	20.42	35.95
Jammu	32.69	74.84	2004-06-07	28.9334	17.25	35.47
Jammu	32.69	74.84	2004-06-08	0	17.93	29.47
Jammu	32.69	74.84	2004-06-09	5.8409	17.42	30.82
Jammu	32.69	74.84	2004-06-10	0	18.31	29.32
Jammu	32.69	74.84	2004-06-11	0	19.24	32.47
Jammu	32.69	74.84	2004-06-12	0	20.32	32.96
Jammu	32.69	74.84	2004-06-13	0	20.73	33.89
Jammu	32.69	74.84	2004-06-14	0	22.7	34.77
Jammu	32.69	74.84	2004-06-15	8.01	21.4	33.75
Jammu	32.69	74.84	2004-06-16	2.2977	21.84	31.91
Jammu	32.69	74.84	2004-06-17	0	23.19	34.92
Jammu	32.69	74.84	2004-06-18	13.3186	22.46	34.31
Jammu	32.69	74.84	2004-06-19	0	24.01	32.84
Jammu	32.69	74.84	2004-06-20	0	23.45	33.63
Jammu	32.69	74.84	2004-06-21	20.5744	20.09	32.53
Jammu	32.69	74.84	2004-06-22	0.6413	20.17	30.77
Jammu	32.69	74.84	2004-06-23	0	19.61	30.39
Jammu	32.69	74.84	2004-06-24	0.1651	19.5	32.66
Jammu	32.69	74.84	2004-06-25	0.1234	17.42	28.86
Jammu	32.69	74.84	2004-06-26	0	19.15	29.88
Jammu	32.69	74.84	2004-06-27	21.0556	16.81	29.27
Jammu	32.69	74.84	2004-06-28	0	18.82	31.95
Jammu	32.69	74.84	2004-06-29	0	19.44	34.35
Jammu	32.69	74.84	2004-06-30	0	21.33	35.12
Jammu	32.69	74.84	2004-07-01	0.8976	22.51	35.64
Jammu	32.69	74.84	2004-07-02	0	23.15	36.06
Jammu	32.69	74.84	2004-07-03	1.6681	22.07	36.35
Jammu	32.69	74.84	2004-07-04	4.7326	22.51	34.27
Jammu	32.69	74.84	2004-07-05	21.23	21.94	34.49
Jammu	32.69	74.84	2004-07-06	0	21.73	32.66
Jammu	32.69	74.84	2004-07-07	37.1659	22.06	34.12
Jammu	32.69	74.84	2004-07-08	0	22.97	34.49
Jammu	32.69	74.84	2004-07-09	56.1949	19.92	33.3
Jammu	32.69	74.84	2004-07-10	2.6132	20.46	30.04
Jammu	32.69	74.84	2004-07-11	0	21.02	32.83
Jammu	32.69	74.84	2004-07-12	3.9634	21.25	33.56
Jammu	32.69	74.84	2004-07-13	0	21.24	31.64
Jammu	32.69	74.84	2004-07-14	38.7812	19.83	32.89
Jammu	32.69	74.84	2004-07-15	0	20.9	30.17
Jammu	32.69	74.84	2004-07-16	3.2638	20.62	31.2
Jammu	32.69	74.84	2004-07-17	35.4967	19.41	30.2
Jammu	32.69	74.84	2004-07-18	0	20.36	32.62
Jammu	32.69	74.84	2004-07-19	0	20.13	32.51
Jammu	32.69	74.84	2004-07-20	11.584	18.41	30.95
Jammu	32.69	74.84	2004-07-21	0	18.31	31.76
Jammu	32.69	74.84	2004-07-22	0	19.61	32.21
Jammu	32.69	74.84	2004-07-23	0.5569	19.4	32.13
Jammu	32.69	74.84	2004-07-24	0	20.11	33.45
Jammu	32.69	74.84	2004-07-25	0	22.04	34.39
Jammu	32.69	74.84	2004-07-26	45.4548	22.4	34.04
Jammu	32.69	74.84	2004-07-27	20.8494	22.73	33.24
Jammu	32.69	74.84	2004-07-28	1.0697	23.25	32.91
Jammu	32.69	74.84	2004-07-29	46.7319	21.82	32.27
Jammu	32.69	74.84	2004-07-30	53.9919	21.58	30.1
Jammu	32.69	74.84	2004-07-31	13.5166	20.78	28.69
Jammu	32.69	74.84	2004-08-01	0	21.06	30.17
Jammu	32.69	74.84	2004-08-02	0	20.48	29.16
Jammu	32.69	74.84	2004-08-03	36.1198	19.52	29.06
Jammu	32.69	74.84	2004-08-04	0	20.6	26.33
Jammu	32.69	74.84	2004-08-05	0	21.73	31.77
Jammu	32.69	74.84	2004-08-06	118.912	22.42	32.8
Jammu	32.69	74.84	2004-08-07	54.827	22.76	30.9
Jammu	32.69	74.84	2004-08-08	0.2645	22.57	30.87
Jammu	32.69	74.84	2004-08-09	0	21.08	29.86
Jammu	32.69	74.84	2004-08-10	17.8818	21.07	29.65
Jammu	32.69	74.84	2004-08-11	0	21.53	32.33
Jammu	32.69	74.84	2004-08-12	0	20.67	31.11
Jammu	32.69	74.84	2004-08-13	0	21.22	31.98
Jammu	32.69	74.84	2004-08-14	0.7508	22.3	32.63
Jammu	32.69	74.84	2004-08-15	6.1995	22.74	32.44
Jammu	32.69	74.84	2004-08-16	12.1542	23.36	33.22
Jammu	32.69	74.84	2004-08-17	19.4005	22.03	30.39
Jammu	32.69	74.84	2004-08-18	16.9457	20.18	26.81
Jammu	32.69	74.84	2004-08-19	0	20.31	29
Jammu	32.69	74.84	2004-08-20	0	20.07	30.47
Jammu	32.69	74.84	2004-08-21	33.1287	19.4	29.75
Jammu	32.69	74.84	2004-08-22	0	20.45	31.66
Jammu	32.69	74.84	2004-08-23	0	19.77	30.76
Jammu	32.69	74.84	2004-08-24	0	19.98	29.21
Jammu	32.69	74.84	2004-08-25	3.1026	19.54	29.85
Jammu	32.69	74.84	2004-08-26	40.9376	19.63	27.95
Jammu	32.69	74.84	2004-08-27	0	20.17	31.45
Jammu	32.69	74.84	2004-08-28	0	18.48	32.13
Jammu	32.69	74.84	2004-08-29	0	19.57	32.11
Jammu	32.69	74.84	2004-08-30	15.6925	20.04	32.76
Jammu	32.69	74.84	2004-08-31	0	19.78	32.56
Jammu	32.69	74.84	2004-09-01	0	18.9	31.94
Jammu	32.69	74.84	2004-09-02	11.0597	17.97	32.25
Jammu	32.69	74.84	2004-09-03	0	18.13	31.75
Jammu	32.69	74.84	2004-09-04	0	18.15	32.78
Jammu	32.69	74.84	2004-09-05	0	18.73	33.13
Jammu	32.69	74.84	2004-09-06	0	18.33	32.89
Jammu	32.69	74.84	2004-09-07	0	18.9	33.6
Jammu	32.69	74.84	2004-09-08	0	19.66	34.19
Jammu	32.69	74.84	2004-09-09	0	21.2	34.64
Jammu	32.69	74.84	2004-09-10	0	21.9	34.47
Jammu	32.69	74.84	2004-09-11	0.1729	21.88	32.72
Jammu	32.69	74.84	2004-09-12	0	22.22	32.42
Jammu	32.69	74.84	2004-09-13	0	22.89	33.45
Jammu	32.69	74.84	2004-09-14	0	23.02	33.72
Jammu	32.69	74.84	2004-09-15	25.8147	20.25	32.12
Jammu	32.69	74.84	2004-09-16	13.0602	18.88	26.74
Jammu	32.69	74.84	2004-09-17	0	18.42	27.4
Jammu	32.69	74.84	2004-09-18	0	18.52	30.71
Jammu	32.69	74.84	2004-09-19	0	18.13	31.01
Jammu	32.69	74.84	2004-09-20	0	18	31.72
Jammu	32.69	74.84	2004-09-21	0	17.89	31.88
Jammu	32.69	74.84	2004-09-22	0	17.84	29.1
Jammu	32.69	74.84	2004-09-23	0	16.76	28.32
Jammu	32.69	74.84	2004-09-24	0	15.11	29.89
Jammu	32.69	74.84	2004-09-25	0	15.88	31.25
Jammu	32.69	74.84	2004-09-26	0	15.41	30.93
Jammu	32.69	74.84	2004-09-27	0	16.02	31.2
Jammu	32.69	74.84	2004-09-28	0	17.01	30.07
Jammu	32.69	74.84	2004-09-29	0	17.77	30.4
Jammu	32.69	74.84	2004-09-30	0	15.69	30
Jammu	32.69	74.84	2004-10-01	0	17.7	30.8
Jammu	32.69	74.84	2004-10-02	0	18.84	29.17
Jammu	32.69	74.84	2004-10-03	25.6249	16.62	23.55
Jammu	32.69	74.84	2004-10-04	0	14.53	25.11
Jammu	32.69	74.84	2004-10-05	0	14.2	28.46
Jammu	32.69	74.84	2004-10-06	0	14.65	29.78
Jammu	32.69	74.84	2004-10-07	0	15.13	30.61
Jammu	32.69	74.84	2004-10-08	0	15.32	29.74
Jammu	32.69	74.84	2004-10-09	0	16.17	29.5
Jammu	32.69	74.84	2004-10-10	0	14.97	28.91
Jammu	32.69	74.84	2004-10-11	34.58	12.38	21.22
Jammu	32.69	74.84	2004-10-12	3.6967	10.45	21.24
Jammu	32.69	74.84	2004-10-13	0	10.22	22.58
Jammu	32.69	74.84	2004-10-14	0	9.9	22.18
Jammu	32.69	74.84	2004-10-15	0	10.39	24.53
Jammu	32.69	74.84	2004-10-16	0	10.36	25.75
Jammu	32.69	74.84	2004-10-17	0	11.35	26.16
Jammu	32.69	74.84	2004-10-18	0	11.24	27.17
Jammu	32.69	74.84	2004-10-19	0	11.91	26.94
Jammu	32.69	74.84	2004-10-20	0	10.84	25.01
Jammu	32.69	74.84	2004-10-21	0	11.18	24.64
Jammu	32.69	74.84	2004-10-22	0	9.95	24.25
Jammu	32.69	74.84	2004-10-23	0	8.99	25.18
Jammu	32.69	74.84	2004-10-24	0	9.75	26.11
Jammu	32.69	74.84	2004-10-25	0	9.74	25.63
Jammu	32.69	74.84	2004-10-26	0	10.56	25.91
Jammu	32.69	74.84	2004-10-27	0	10.52	21.56
Jammu	32.69	74.84	2004-10-28	0	8.4	22
Jammu	32.69	74.84	2004-10-29	0	8.01	21.67
Jammu	32.69	74.84	2004-10-30	0	7.34	22.09
Jammu	32.69	74.84	2004-10-31	0	7.02	23.58
Jammu	32.69	74.84	2004-11-01	0	7.14	23.46
Jammu	32.69	74.84	2004-11-02	0	6.9	23.45
Jammu	32.69	74.84	2004-11-03	0	7.23	23.47
Jammu	32.69	74.84	2004-11-04	0	6.99	23.79
Jammu	32.69	74.84	2004-11-05	0	6.98	24.08
Jammu	32.69	74.84	2004-11-06	0	7.48	24.25
Jammu	32.69	74.84	2004-11-07	0	6.81	23.62
Jammu	32.69	74.84	2004-11-08	0	6.43	23.94
Jammu	32.69	74.84	2004-11-09	0	6.86	23.78
Jammu	32.69	74.84	2004-11-10	0	6.67	23.64
Jammu	32.69	74.84	2004-11-11	0	6.97	23.03
Jammu	32.69	74.84	2004-11-12	0	6.97	22.44
Jammu	32.69	74.84	2004-11-13	0	7.39	22.3
Jammu	32.69	74.84	2004-11-14	0	7.02	22.61
Jammu	32.69	74.84	2004-11-15	0	6.79	23.19
Jammu	32.69	74.84	2004-11-16	0	6.91	23.09
Jammu	32.69	74.84	2004-11-17	0	7.28	23.54
Jammu	32.69	74.84	2004-11-18	0	6.59	22.59
Jammu	32.69	74.84	2004-11-19	0	6.17	23.02
Jammu	32.69	74.84	2004-11-20	0	6.81	23.02
Jammu	32.69	74.84	2004-11-21	0	8.04	23.12
Jammu	32.69	74.84	2004-11-22	0	9.22	23.34
Jammu	32.69	74.84	2004-11-23	0	7.81	23.02
Jammu	32.69	74.84	2004-11-24	0	7.46	22.63
Jammu	32.69	74.84	2004-11-25	0	6.96	21.87
Jammu	32.69	74.84	2004-11-26	0	6.65	20.7
Jammu	32.69	74.84	2004-11-27	0	6.97	19.94
Jammu	32.69	74.84	2004-11-28	0	5.81	19.19
Jammu	32.69	74.84	2004-11-29	0	6.64	20.16
Jammu	32.69	74.84	2004-11-30	15.0379	6.5	19.1
Jammu	32.69	74.84	2004-12-01	0	6.06	14.55
Jammu	32.69	74.84	2004-12-02	0	5.45	15.06
Jammu	32.69	74.84	2004-12-03	0	3.69	17.88
Jammu	32.69	74.84	2004-12-04	0	4.17	19.28
Jammu	32.69	74.84	2004-12-05	0	3.52	18.42
Jammu	32.69	74.84	2004-12-06	0	3.56	18.38
Jammu	32.69	74.84	2004-12-07	0	3.85	18.75
Jammu	32.69	74.84	2004-12-08	0	2.72	18.11
Jammu	32.69	74.84	2004-12-09	0	3.42	19.82
Jammu	32.69	74.84	2004-12-10	0	3.58	19.74
Jammu	32.69	74.84	2004-12-11	0	3.77	19.34
Jammu	32.69	74.84	2004-12-12	0	3.54	17.95
Jammu	32.69	74.84	2004-12-13	0	3.91	19.77
Jammu	32.69	74.84	2004-12-14	0	4.26	19.96
Jammu	32.69	74.84	2004-12-15	0	4.45	19.22
Jammu	32.69	74.84	2004-12-16	0	4.63	20.24
Jammu	32.69	74.84	2004-12-17	0	5.54	19.78
Jammu	32.69	74.84	2004-12-18	0	4.72	20.6
Jammu	32.69	74.84	2004-12-19	0	5.44	19.42
Jammu	32.69	74.84	2004-12-20	34.0368	3.81	17.3
Jammu	32.69	74.84	2004-12-21	0	3.52	13.49
Jammu	32.69	74.84	2004-12-22	0	2.77	14.83
Jammu	32.69	74.84	2004-12-23	0	3.25	15.61
Jammu	32.69	74.84	2004-12-24	0	3.29	12.64
Jammu	32.69	74.84	2004-12-25	0	2.69	13.99
Jammu	32.69	74.84	2004-12-26	0	1.45	14.06
Jammu	32.69	74.84	2004-12-27	0	1.74	13.52
Jammu	32.69	74.84	2004-12-28	0	4.4	13.49
Jammu	32.69	74.84	2004-12-29	0	3.35	13.42
Jammu	32.69	74.84	2004-12-30	0	4.43	15.07
Jammu	32.69	74.84	2004-12-31	0	6.39	14.33
Jammu	32.69	74.84	2005-01-01	40.6651	4.94	11.67
Jammu	32.69	74.84	2005-01-02	0.1507	4.58	12.33
Jammu	32.69	74.84	2005-01-03	0	3.61	12
Jammu	32.69	74.84	2005-01-04	0	1.49	12.42
Jammu	32.69	74.84	2005-01-05	0	1.88	12.69
Jammu	32.69	74.84	2005-01-06	0	1.92	13.09
Jammu	32.69	74.84	2005-01-07	0	2.05	13.72
Jammu	32.69	74.84	2005-01-08	0	1.61	14.14
Jammu	32.69	74.84	2005-01-09	0	2.83	14.88
Jammu	32.69	74.84	2005-01-10	0	2.17	14.56
Jammu	32.69	74.84	2005-01-11	0	1.09	14.8
Jammu	32.69	74.84	2005-01-12	0	1.84	12.98
Jammu	32.69	74.84	2005-01-13	0	2.57	14.89
Jammu	32.69	74.84	2005-01-14	0	3	16.57
Jammu	32.69	74.84	2005-01-15	0	3.01	16.52
Jammu	32.69	74.84	2005-01-16	0	1.92	16.39
Jammu	32.69	74.84	2005-01-17	0	1.6	15.83
Jammu	32.69	74.84	2005-01-18	0	1.24	12.4
Jammu	32.69	74.84	2005-01-19	0	-0.12	13.29
Jammu	32.69	74.84	2005-01-20	0	-0.17	13.92
Jammu	32.69	74.84	2005-01-21	0	3.22	13.03
Jammu	32.69	74.84	2005-01-22	36.221	2.13	9.14
Jammu	32.69	74.84	2005-01-23	27.6278	0.51	6.89
Jammu	32.69	74.84	2005-01-24	0	2.16	9.61
Jammu	32.69	74.84	2005-01-25	0	2.01	9.92
Jammu	32.69	74.84	2005-01-26	0	1.99	13.58
Jammu	32.69	74.84	2005-01-27	0	2.44	13.94
Jammu	32.69	74.84	2005-01-28	20.821	1.53	12.49
Jammu	32.69	74.84	2005-01-29	0	0.53	12.81
Jammu	32.69	74.84	2005-01-30	0	1.28	13.17
Jammu	32.69	74.84	2005-01-31	0	1.88	11.96
Jammu	32.69	74.84	2005-02-01	0	1.16	13.76
Jammu	32.69	74.84	2005-02-02	0	1.56	14.26
Jammu	32.69	74.84	2005-02-03	0	3.11	14.25
Jammu	32.69	74.84	2005-02-04	0	3.55	12.18
Jammu	32.69	74.84	2005-02-05	1.028	3.82	11.87
Jammu	32.69	74.84	2005-02-06	1.2359	4.34	10.32
Jammu	32.69	74.84	2005-02-07	19.6759	4.32	10.62
Jammu	32.69	74.84	2005-02-08	9.4115	4.32	8.49
Jammu	32.69	74.84	2005-02-09	13.5324	5.01	12.08
Jammu	32.69	74.84	2005-02-10	22.457	4.12	9.64
Jammu	32.69	74.84	2005-02-11	3.999	5.02	12.09
Jammu	32.69	74.84	2005-02-12	3.9986	5.94	13.24
Jammu	32.69	74.84	2005-02-13	0.296	5.21	14.54
Jammu	32.69	74.84	2005-02-14	0.1507	5.48	16.67
Jammu	32.69	74.84	2005-02-15	1.125	6.06	15.46
Jammu	32.69	74.84	2005-02-16	14.8847	3.56	9.63
Jammu	32.69	74.84	2005-02-17	0	3.31	13.5
Jammu	32.69	74.84	2005-02-18	19.3907	3.93	12.06
Jammu	32.69	74.84	2005-02-19	28.0917	4.13	10.26
Jammu	32.69	74.84	2005-02-20	0.5562	3.07	10.72
Jammu	32.69	74.84	2005-02-21	0	1.69	10.91
Jammu	32.69	74.84	2005-02-22	0	2.53	14.52
Jammu	32.69	74.84	2005-02-23	0	3.23	13.83
Jammu	32.69	74.84	2005-02-24	0	5.28	14.52
Jammu	32.69	74.84	2005-02-25	0	4.11	15.3
Jammu	32.69	74.84	2005-02-26	0	5.21	15.95
Jammu	32.69	74.84	2005-02-27	0	6.84	17.76
Jammu	32.69	74.84	2005-02-28	0	6.74	15.5
Jammu	32.69	74.84	2005-03-01	0	7.77	15.76
Jammu	32.69	74.84	2005-03-02	2.5175	7.24	15.03
Jammu	32.69	74.84	2005-03-03	0	8.06	17.05
Jammu	32.69	74.84	2005-03-04	0.4839	8.24	18.66
Jammu	32.69	74.84	2005-03-05	12.5823	8.21	20.35
Jammu	32.69	74.84	2005-03-06	0.2045	7.11	16.45
Jammu	32.69	74.84	2005-03-07	0	7.63	19.37
Jammu	32.69	74.84	2005-03-08	0	7.3	19.53
Jammu	32.69	74.84	2005-03-09	0	8.96	20.98
Jammu	32.69	74.84	2005-03-10	29.154	7.89	15.38
Jammu	32.69	74.84	2005-03-11	1.6613	6.46	14.63
Jammu	32.69	74.84	2005-03-12	0	7.41	20.79
Jammu	32.69	74.84	2005-03-13	0	8.77	22.51
Jammu	32.69	74.84	2005-03-14	0	8.16	22.29
Jammu	32.69	74.84	2005-03-15	0	10.32	24.31
Jammu	32.69	74.84	2005-03-16	0.1049	12.37	24.83
Jammu	32.69	74.84	2005-03-17	0.3609	12.55	24.05
Jammu	32.69	74.84	2005-03-18	7.2414	11.09	20.45
Jammu	32.69	74.84	2005-03-19	16.4033	9.75	18.49
Jammu	32.69	74.84	2005-03-20	0.4346	9.96	20
Jammu	32.69	74.84	2005-03-21	0	11.61	21.85
Jammu	32.69	74.84	2005-03-22	40.1426	8.03	15.87
Jammu	32.69	74.84	2005-03-23	0	8.53	18.41
Jammu	32.69	74.84	2005-03-24	0	7.61	20.09
Jammu	32.69	74.84	2005-03-25	0	8.64	22.67
Jammu	32.69	74.84	2005-03-26	0	9.6	21.09
Jammu	32.69	74.84	2005-03-27	0.1388	11.05	23.55
Jammu	32.69	74.84	2005-03-28	0	9.67	19.84
Jammu	32.69	74.84	2005-03-29	0	9.59	23.18
Jammu	32.69	74.84	2005-03-30	0	9.14	23.81
Jammu	32.69	74.84	2005-03-31	0	7.98	22.62
Jammu	32.69	74.84	2005-04-01	0	9.69	24.65
Jammu	32.69	74.84	2005-04-02	0	9.8	26.32
Jammu	32.69	74.84	2005-04-03	0	10.51	27.14
Jammu	32.69	74.84	2005-04-04	0	11.85	28.3
Jammu	32.69	74.84	2005-04-05	0	14	29.54
Jammu	32.69	74.84	2005-04-06	0	15.89	29.57
Jammu	32.69	74.84	2005-04-07	0	13.87	26.36
Jammu	32.69	74.84	2005-04-08	0	14.39	23.52
Jammu	32.69	74.84	2005-04-09	0	9.96	23.86
Jammu	32.69	74.84	2005-04-10	0	10.01	22.45
Jammu	32.69	74.84	2005-04-11	0	8.12	21.44
Jammu	32.69	74.84	2005-04-12	0	9.4	23.92
Jammu	32.69	74.84	2005-04-13	0	10.83	26.02
Jammu	32.69	74.84	2005-04-14	0	14.42	28.61
Jammu	32.69	74.84	2005-04-15	0	13.2	26.84
Jammu	32.69	74.84	2005-04-16	0	12.86	28.82
Jammu	32.69	74.84	2005-04-17	0	12.7	29.07
Jammu	32.69	74.84	2005-04-18	0	12.28	28.68
Jammu	32.69	74.84	2005-04-19	0	13.39	29.98
Jammu	32.69	74.84	2005-04-20	0	14.42	31.7
Jammu	32.69	74.84	2005-04-21	0	14.82	31.4
Jammu	32.69	74.84	2005-04-22	0	16.09	31.8
Jammu	32.69	74.84	2005-04-23	0.1855	16.23	31.24
Jammu	32.69	74.84	2005-04-24	5.9985	15.92	28.65
Jammu	32.69	74.84	2005-04-25	0	15.29	28.47
Jammu	32.69	74.84	2005-04-26	7.2815	13.37	25.46
Jammu	32.69	74.84	2005-04-27	0	12.79	25.49
Jammu	32.69	74.84	2005-04-28	0.4281	12.62	24.83
Jammu	32.69	74.84	2005-04-29	0	13.35	28.14
Jammu	32.69	74.84	2005-04-30	0	13.8	29.5
Jammu	32.69	74.84	2005-05-01	0	14.91	30.03
Jammu	32.69	74.84	2005-05-02	0.2099	15.13	30.04
Jammu	32.69	74.84	2005-05-03	7.4417	15.51	29.99
Jammu	32.69	74.84	2005-05-04	0.5111	14.67	24.58
Jammu	32.69	74.84	2005-05-05	0	14.93	28.23
Jammu	32.69	74.84	2005-05-06	0	15.83	28.79
Jammu	32.69	74.84	2005-05-07	0	15.87	30.48
Jammu	32.69	74.84	2005-05-08	0	16.45	31.72
Jammu	32.69	74.84	2005-05-09	0.328	15.91	30.73
Jammu	32.69	74.84	2005-05-10	0	13.71	29.37
Jammu	32.69	74.84	2005-05-11	0	14.29	28.45
Jammu	32.69	74.84	2005-05-12	0	15.49	30.71
Jammu	32.69	74.84	2005-05-13	0	16.71	31.76
Jammu	32.69	74.84	2005-05-14	2.5257	14.14	28.9
Jammu	32.69	74.84	2005-05-15	0	15.6	31.23
Jammu	32.69	74.84	2005-05-16	0	17.01	33.14
Jammu	32.69	74.84	2005-05-17	0	16.08	30.86
Jammu	32.69	74.84	2005-05-18	0.2214	16.23	31.27
Jammu	32.69	74.84	2005-05-19	0	16.74	30.28
Jammu	32.69	74.84	2005-05-20	0	16.64	29.88
Jammu	32.69	74.84	2005-05-21	0	18.26	31.51
Jammu	32.69	74.84	2005-05-22	0	16.97	28
Jammu	32.69	74.84	2005-05-23	0	17.99	30.16
Jammu	32.69	74.84	2005-05-24	0	16.89	29.83
Jammu	32.69	74.84	2005-05-25	0	17.31	31.89
Jammu	32.69	74.84	2005-05-26	0	18.08	32.45
Jammu	32.69	74.84	2005-05-27	0.1158	16.25	30.4
Jammu	32.69	74.84	2005-05-28	0	17.2	31.77
Jammu	32.69	74.84	2005-05-29	0	19.24	32.97
Jammu	32.69	74.84	2005-05-30	0	18.47	30.06
Jammu	32.69	74.84	2005-05-31	0	17.56	28.89
Jammu	32.69	74.84	2005-06-01	0	16.86	31.22
Jammu	32.69	74.84	2005-06-02	0	17.38	33.38
Jammu	32.69	74.84	2005-06-03	0	18.45	34.25
Jammu	32.69	74.84	2005-06-04	0	17.9	35.61
Jammu	32.69	74.84	2005-06-05	0	19.58	37.3
Jammu	32.69	74.84	2005-06-06	0	19.66	36.21
Jammu	32.69	74.84	2005-06-07	0	17.94	33.44
Jammu	32.69	74.84	2005-06-08	4.2295	17.3	32.46
Jammu	32.69	74.84	2005-06-09	0	18.79	32.05
Jammu	32.69	74.84	2005-06-10	0	18.23	33.88
Jammu	32.69	74.84	2005-06-11	0	19.65	34.36
Jammu	32.69	74.84	2005-06-12	0	19.93	34.56
Jammu	32.69	74.84	2005-06-13	1.8533	18.95	32.26
Jammu	32.69	74.84	2005-06-14	0	19.09	33.35
Jammu	32.69	74.84	2005-06-15	0	20.13	33.8
Jammu	32.69	74.84	2005-06-16	0	19.35	35.1
Jammu	32.69	74.84	2005-06-17	0	20.43	35.44
Jammu	32.69	74.84	2005-06-18	0	20.87	36.05
Jammu	32.69	74.84	2005-06-19	0	20.07	34.61
Jammu	32.69	74.84	2005-06-20	0	21.47	35.71
Jammu	32.69	74.84	2005-06-21	0	21.98	38.17
[truncated: 23,204 more rows]
